# Supplementary material for: The Simplest Amino‐borane H2B=NH2 Trapped on a Rhodium Dimer: Pre‐Catalysts for Amine–Borane Dehydropolymerization
Source: PubMed Central journal article supplement (PMC5074255; doi:10.1002/anie.201600898), 2016-04-21
Supplement: ANIE-55-6651-s001.pdf [file ANIE-55-6651-s001.pdf]

Supporting Information

**The Simplest Amino-borane  $\text{H}_2\text{B}=\text{NH}_2$  Trapped on a Rhodium Dimer:  
Pre-Catalysts for Amine-Borane Dehydropolymerization**

*Amit Kumar, Nicholas A. Beattie, Sebastian D. Pike, Stuart A. Macgregor,\* and  
Andrew S. Weller\**

anie\_201600898\_sm\_miscellaneous\_information.pdf

|                                                                                                                                                                                                                                                                                                                             |     |
|-----------------------------------------------------------------------------------------------------------------------------------------------------------------------------------------------------------------------------------------------------------------------------------------------------------------------------|-----|
| 1. General experimental procedures .....                                                                                                                                                                                                                                                                                    | S1  |
| 2. Synthesis of new complexes .....                                                                                                                                                                                                                                                                                         | S2  |
| 3. Variable temperature NMR spectra of <b>4</b> and Eyring analysis .....                                                                                                                                                                                                                                                   | S5  |
| 4. Stoichiometric reactions of H <sub>3</sub> B·NH <sub>3</sub> with <b>1</b> and <b>2</b> in THF .....                                                                                                                                                                                                                     | S6  |
| 5. Reaction of 4 equivalents of H <sub>3</sub> B·NH <sub>3</sub> with <b>2</b> in THF .....                                                                                                                                                                                                                                 | S7  |
| 6. General method for the catalytic dehydrocoupling (open system).....                                                                                                                                                                                                                                                      | S8  |
| 7. Catalytic dehydrocoupling of H <sub>3</sub> B·NH <sub>3</sub> using 0.5 mol% <b>1</b> in THF.....                                                                                                                                                                                                                        | S8  |
| 8. Catalytic dehydrogenation of H <sub>3</sub> B·NH <sub>3</sub> using 0.5 mol% [BH <sub>2</sub> (NH <sub>3</sub> )(OEt <sub>2</sub> )][BAR <sup>F</sup> <sub>4</sub> ] in THF .....                                                                                                                                        | S10 |
| 9. Catalytic dehydrocoupling of H <sub>3</sub> B·NH <sub>3</sub> using <b>2</b> (4 mol%) or [Rh(P <sup>i</sup> Pr <sub>2</sub> (CH <sub>2</sub> ) <sub>3</sub> P <sup>i</sup> Pr <sub>2</sub> ) <sub>2</sub> (H) <sub>2</sub> (μ-H) <sub>3</sub> ][BAR <sup>F</sup> <sub>4</sub> ] (2 mol%) in THF in a closed system ..... | S11 |
| 10. Catalytic dehydrocoupling of H <sub>3</sub> B·NH <sub>3</sub> using <b>2</b> (4 mol%) or <b>4</b> (2 mol%) in THF in a closed system .....                                                                                                                                                                              | S11 |
| 11. Reactivity of H <sub>3</sub> B·NH <sub>2</sub> Me with <b>1</b> in THF: Formation of <b>8</b> .....                                                                                                                                                                                                                     | S13 |
| 12. Reactivity of H <sub>3</sub> B·NH <sub>2</sub> Me with <b>1</b> in 1,2-F <sub>2</sub> C <sub>6</sub> H <sub>4</sub> : Formation of <b>8</b> .....                                                                                                                                                                       | S13 |
| 13. Catalytic dehydrocoupling of H <sub>3</sub> B·NH <sub>2</sub> Me using 0.5 mol% <b>1</b> in THF.....                                                                                                                                                                                                                    | S14 |
| 14. Catalytic dehydrocoupling of H <sub>3</sub> B·NH <sub>2</sub> Me using 0.5 mol% <b>1</b> in 1,2-F <sub>2</sub> C <sub>6</sub> H <sub>4</sub> .....                                                                                                                                                                      | S16 |
| 15. Preparation ( <i>in situ</i> ) of <b>8</b> in THF.....                                                                                                                                                                                                                                                                  | S17 |
| 16. Catalytic dehydrocoupling of H <sub>3</sub> B·NH <sub>2</sub> Me using <i>in situ</i> prepared <b>8</b> (0.25 mol%) in THF .....                                                                                                                                                                                        | S17 |
| 17. Catalytic dehydrocoupling of H <sub>3</sub> B·NH <sub>2</sub> Me using <i>in situ</i> prepared <b>8</b> (0.25 mol%) in 1,2-F <sub>2</sub> C <sub>6</sub> H <sub>4</sub> ...                                                                                                                                             | S18 |
| 18. Catalytic dehydrocoupling of H <sub>3</sub> B·NMe <sub>2</sub> H in 1,2-F <sub>2</sub> C <sub>6</sub> H <sub>4</sub> .....                                                                                                                                                                                              | S19 |
| 19. Reactivity of H <sub>3</sub> B·NMe <sub>2</sub> H with <b>1</b> in THF: Formation of [Rh(PPh <sub>2</sub> (CH <sub>2</sub> ) <sub>3</sub> PPh <sub>2</sub> ) <sub>2</sub> (μ-H)(μ-BH <sub>2</sub> NMe <sub>2</sub> )] [BAR <sup>F</sup> <sub>4</sub> ].....                                                             | S20 |
| 20. Initial rate studies in THF in a closed system .....                                                                                                                                                                                                                                                                    | S20 |
| 21. X-ray crystallography details.....                                                                                                                                                                                                                                                                                      | S22 |
| 22. Computational details and references .....                                                                                                                                                                                                                                                                              | S27 |
| 23. QTAIM results .....                                                                                                                                                                                                                                                                                                     | S29 |
| 24. Calculated <sup>11</sup> B NMR shifts .....                                                                                                                                                                                                                                                                             | S36 |
| 25. Pipek-Mezey localised orbitals .....                                                                                                                                                                                                                                                                                    | S37 |
| 26. Cartesian coordinates (Å) and computed energies (in hartrees) for all optimised structures .....                                                                                                                                                                                                                        | S38 |
| 27. References .....                                                                                                                                                                                                                                                                                                        | S44 |

## 1. General experimental procedures

All manipulations, unless otherwise stated, were performed under an argon atmosphere using standard Schlenk and glove-box techniques. Glassware was oven dried at 130°C overnight and flamed under vacuum prior to use. Ether, pentane and MeCN were dried using

a Grubbs type solvent purification system (MBraun SPS-800) and degassed by successive freeze-pump-thaw cycles.<sup>1</sup> THF was distilled from sodium benzophenone ketyl, degassed by successive freeze-pump-thaw cycles and stored over 3 Å molecular sieves. 1,2-F<sub>2</sub>C<sub>6</sub>H<sub>4</sub> was dried over CaH<sub>2</sub>, vacuum distilled and stored over 3 Å molecular sieves. [Rh(P<sup>i</sup>Pr<sub>2</sub>(CH<sub>2</sub>)<sub>3</sub>P<sup>i</sup>Pr<sub>2</sub>)(C<sub>6</sub>H<sub>5</sub>F)][BAR<sup>F</sup><sub>4</sub>],<sup>2</sup> [Rh(P<sup>i</sup>Pr<sub>2</sub>(CH<sub>2</sub>)<sub>3</sub>P<sup>i</sup>Pr<sub>2</sub>)(μ-H)]<sub>2</sub>,<sup>3</sup> [BH<sub>2</sub>(NH<sub>3</sub>)(OEt<sub>2</sub>)] [BAR<sup>F</sup><sub>4</sub>],<sup>4</sup> [Rh(PPh<sub>2</sub>(CH<sub>2</sub>)<sub>3</sub>PPh<sub>2</sub>)(C<sub>6</sub>H<sub>5</sub>F)][BAR<sup>F</sup><sub>4</sub>],<sup>5</sup> H<sub>3</sub>B·NMeH<sub>2</sub><sup>6</sup> and [{Rh(P<sup>i</sup>Pr<sub>2</sub>(CH<sub>2</sub>)<sub>3</sub>P<sup>i</sup>Pr<sub>2</sub>)}<sub>2</sub>(H)<sub>2</sub>(μ-H)<sub>3</sub>][BAR<sup>F</sup><sub>4</sub>]<sup>8</sup> were prepared by literature methods. H<sub>3</sub>B·NH<sub>3</sub>, H<sub>3</sub>B·NMe<sub>2</sub>H and H<sub>3</sub>B·NMe<sub>3</sub> were purchased from Aldrich and sublimed prior to use at conditions 1 x 10<sup>-2</sup> Torr, 333 K (for H<sub>3</sub>B·NH<sub>3</sub>) and 5 x 10<sup>-2</sup> Torr, 298 K (twice for H<sub>3</sub>B·NMe<sub>2</sub>H and once for H<sub>3</sub>B·NMe<sub>3</sub>). In C<sub>6</sub>H<sub>5</sub>F and 1,2-F<sub>2</sub>C<sub>6</sub>H<sub>4</sub>, <sup>1</sup>H NMR spectra were referenced to the centre of the downfield solvent multiplet, δ = 7.11 and 7.07 respectively. <sup>31</sup>P and <sup>11</sup>B NMR spectra were referenced against 85% H<sub>3</sub>PO<sub>4</sub> (external) and BF<sub>3</sub>·OEt<sub>2</sub> (external) respectively. The spectrometer was pre-locked and pre-shimmed to the solvent mixture of 0.3 ml of 1,2-C<sub>6</sub>H<sub>4</sub>F<sub>2</sub> and 0.1 ml of C<sub>6</sub>D<sub>6</sub>. Chemical shifts (δ) are quoted in ppm and coupling constants (J) in Hz. ESI-MS were recorded on a Bruker micrOTOF instrument interfaced with a glove-box.<sup>7</sup> Microanalysis was performed by Elemental Microanalysis Ltd. Initial rates were calculated from the pseudo zero-order region of the consumption of amine-boranes as measured by <sup>11</sup>B NMR spectroscopy over the first 10 minutes of catalysis. Catalytic dehydrocoupling of amine-boranes in open system was carried in a 3-necked Schlenk flask connected to an external mineral oil bubbler with tubing attached. Evolution of hydrogen gas vs. time was monitored by attaching a cannula to the Schlenk, the other end of the cannula was placed under an upturned 50 mL burette filled with water. Gel permeation chromatography (GPC) was performed on a Waters 1515 equipped with an isocratic HPLC pump. Styragel HR5E THF (4.6 x 300 mm) columns were used. THF containing 0.1% w/w [<sup>n</sup>Bu<sub>4</sub>N]Br was used as the eluent at a flow rate of 1.0 mL min<sup>-1</sup>. Samples were dissolved in the eluent (2 mg mL<sup>-1</sup>), left for 6 h at room temperature and filtered with an Acrodisc CR 13 mm syringe filter (with 0.2 μm PTFE membrane) before analysis. The calibration was conducted using a Polystyrene Ready-Cal kit.

## 2. Synthesis of new complexes

### [(Rh(P<sup>i</sup>Pr<sub>2</sub>(CH<sub>2</sub>)<sub>3</sub>P<sup>i</sup>Pr<sub>2</sub>))<sub>2</sub>(μ-H)(μ-BH<sub>2</sub>NH<sub>2</sub>)] [BAR<sup>F</sup><sub>4</sub>] (4)

[Rh(P<sup>i</sup>Pr<sub>2</sub>(CH<sub>2</sub>)<sub>3</sub>P<sup>i</sup>Pr<sub>2</sub>)(μ-H)]<sub>2</sub> (47 mg, 6.2 x 10<sup>-2</sup> mmol) and [BH<sub>2</sub>(NH<sub>3</sub>)(OEt<sub>2</sub>)] [BAR<sup>F</sup><sub>4</sub>] (62 mg, 6.2 x 10<sup>-2</sup> mmol) were added to a Schlenk flask to which Et<sub>2</sub>O (~3 mL) was added. Addition of Et<sub>2</sub>O led to immediate bubbling and the resulting orange solution was stirred for 10

minutes. The orange solution was filtered, concentrated to ~1 mL and then layered with pentane at  $-18\text{ }^{\circ}\text{C}$  to yield  $[(\text{Rh}(\text{P}^i\text{Pr}_2(\text{CH}_2)_3\text{P}^i\text{Pr}_2))_2(\mu\text{-H})(\mu\text{-BH}_2\text{NH}_2)][\text{BAr}^{\text{F}}_4]$  as orange crystals. Yield: 80 mg, 78%.

**$^1\text{H}$  NMR (500 MHz,  $\text{d}_8\text{-THF}$ ):**  $\delta$  7.79 (s, 8H,  $[\text{BAr}^{\text{F}}_4]$ ), 7.57 (s, 4H,  $[\text{BAr}^{\text{F}}_4]$ ), 4.55 (s, 2H,  $\text{NH}_2$ ), 2.09 (br, 8H, CH), 1.25 (m, 24H,  $\text{CH}_3$ ), 1.12 (m, 24H,  $\text{CH}_3$ ), 0.11 (br, 12H,  $\text{CH}_2\text{CH}_2\text{CH}_2$ ),  $-8.64$  (s, 3H,  $\text{BH}_2$  and RhH).

**$^1\text{H}$  NMR (500 MHz,  $\text{d}_8\text{-THF}$ , 180 K):**  $\delta$  7.90 (s, 8H,  $[\text{BAr}^{\text{F}}_4]$ ), 7.75 (s, 4H,  $[\text{BAr}^{\text{F}}_4]$ ), 5.05 (s, 2H,  $\text{NH}_2$ ), 1.38 – 0.96 (broad overlapping multiplet, 48 H,  $\text{CH}_3$ ), 0.11 (br, 12H,  $\text{CH}_2\text{CH}_2\text{CH}_2$ ),  $-8.16$  (br d,  $^2J_{\text{HP}} = 56$ , 2H,  $\text{BH}_2$ ),  $-9.02$  (br, 1H, RhH), CH signals are obscured by THF signals. The resonances (chemical shifts and respective couplings) shown by the  $^1\text{H}\{^{11}\text{B}\}$  NMR spectrum at 180 K are the same as those of the  $^1\text{H}$  NMR spectrum at 180 K.

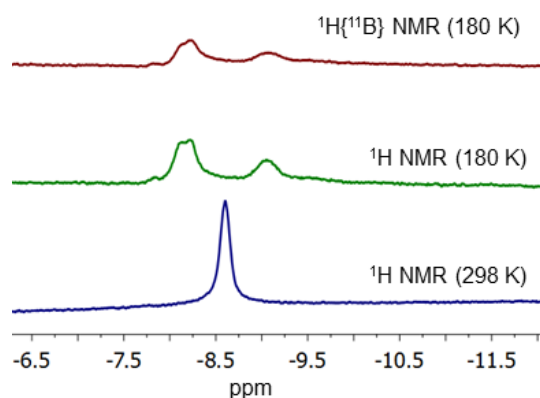

**Figure S1**  $^1\text{H}$  and  $^1\text{H}\{^{11}\text{B}\}$  NMR spectra of **4** showing the hydride region.

**$^{31}\text{P}\{^1\text{H}\}$  NMR (202 MHz,  $\text{d}_8\text{-THF}$ ):**  $\delta$  40.8 (d,  $J_{\text{RhP}} = 142$ ).

**$^{31}\text{P}\{^1\text{H}\}$  NMR (202 MHz,  $\text{d}_8\text{-THF}$ , 180 K):**  $\delta$  41.6 (br d,  $J_{\text{RhP}} = 140$ ), 36.1 (br d,  $J_{\text{RhP}} = 140$ ).

**$^{11}\text{B}$  NMR (160 MHz,  $\text{d}_8\text{-THF}$ ):**  $\delta$  51.1 (br,  $\text{BH}_2$ ),  $-6.5$  (s,  $[\text{BAr}^{\text{F}}_4]$ ).

**ESI-MS** (1,2- $\text{C}_6\text{H}_4\text{F}_2$ ,  $60\text{ }^{\circ}\text{C}$ ) positive ion:  $m/z$  788.2897  $[\text{M}^+]$  (calc. 788.2952).

**Elemental Microanalysis:** Calc.  $[\text{C}_{62}\text{H}_{85}\text{B}_2\text{F}_{24}\text{NP}_4\text{Rh}_2]$  ( $1651.6567\text{g mol}^{-1}$ ): C, 45.09; H, 5.19; N, 0.85. Found: C, 44.42; H, 5.12; N, 0.94.

### **$[\text{Rh}(\text{PPh}_2(\text{CH}_2)_3\text{PPh}_2)(\text{THF})_2][\text{BAr}^{\text{F}}_4]$ (**6**)**

THF (1 mL) was added to a Schlenk flask containing  $[\text{Rh}(\text{PPh}_2(\text{CH}_2)_3\text{PPh}_2)(\text{C}_6\text{H}_5\text{F})][\text{BAr}^{\text{F}}_4]$  (50 mg,  $3.4 \times 10^{-2}$  mmol) and stirred for 15 minutes. Resulting orange solution was layered

with pentane at  $-18\text{ }^{\circ}\text{C}$  to yield  $[\text{Rh}(\text{PPh}_2(\text{CH}_2)_3\text{PPh}_2)(\text{THF})_2][\text{BAr}^{\text{F}}_4]$  as orange crystals.

Yield: 30 mg, 60%.

$^1\text{H NMR}$  (500 MHz,  $\text{d}_8\text{-THF}$ ):  $\delta$  7.82 (s, 8H,  $[\text{BAr}^{\text{F}}_4]^-$ ), 7.62 (s, 4H,  $[\text{BAr}^{\text{F}}_4]^-$ ), 7.61 (br, 8 H, Ph) 7.47 (br, 12H, Ph), 2.50 (br, 8H,  $\text{OCH}_2$ ), 1.35-0.93 (m, 8H,  $\text{CH}_2$ ), 0.15 (br, 6H,  $\text{CH}_2\text{CH}_2\text{CH}_2$ ),

$^{31}\text{P}\{^1\text{H}\}$  NMR (202 MHz,  $\text{d}_8\text{-THF}$ ):  $\delta$  37.3 (d,  $J_{\text{RhP}} = 192$ ).

ESI-MS (THF,  $60\text{ }^{\circ}\text{C}$ ) positive ion:  $m/z$  659.1790  $[\text{M}^+]$  (calc. 659.1710).

Elemental Microanalysis: Calc.  $[\text{C}_{50}\text{H}_{58}\text{B}_2\text{F}_{24}\text{NP}_2\text{Rh}]$  ( $1315.2897\text{ g mol}^{-1}$ ): C, 52.85; H, 3.57.

Found: C, 52.95; H, 3.10.

### $[\text{Rh}(\text{P}^i\text{Pr}_2(\text{CH}_2)_3\text{P}^i\text{Pr}_2)(\eta^2\text{-H}_3\text{B}\cdot\text{NMe}_3)][\text{BAr}^{\text{F}}_4]$ (7)

$[\text{Rh}(\text{P}^i\text{Pr}_2(\text{CH}_2)_3\text{P}^i\text{Pr}_2)(\text{C}_6\text{H}_5\text{F})][\text{BAr}^{\text{F}}_4]$  (32 mg,  $2.4 \times 10^{-2}$  mmol) and  $\text{H}_3\text{B}\cdot\text{NMe}_3$  (1.8 mg,  $2.4 \times 10^{-2}$  mmol) were added to a Schlenk flask to which  $\text{Et}_2\text{O}$  ( $\sim 1$  mL) was added. Resulting solution was stirred for 2 h and then layered with pentane at  $-18\text{ }^{\circ}\text{C}$  to yield  $[\text{Rh}(\text{P}^i\text{Pr}_2(\text{CH}_2)_3\text{P}^i\text{Pr}_2)(\eta^2\text{-H}_3\text{B}\cdot\text{NMe}_3)][\text{BAr}^{\text{F}}_4]$  as purple crystals. Yield: 20 mg, 64%.

$^1\text{H NMR}$  (500 MHz,  $\text{CD}_2\text{Cl}_2$ ):  $\delta$  7.76 (s, 8H,  $[\text{BAr}^{\text{F}}_4]^-$ ), 7.60 (s, 4H,  $[\text{BAr}^{\text{F}}_4]^-$ ), 2.89 (s, 9H,  $\text{NMe}_3$ ), 1.94 (br, 6H,  $\text{CH}_2\text{CH}_2\text{CH}_2$ ), 1.5 (br, 4H, CH), 1.23 (m, 24H,  $\text{CH}_3$ ),  $-1.9$  (br, 3H,  $\text{BH}_3$ ).

$^{31}\text{P}\{^1\text{H}\}$  NMR (202 MHz,  $\text{CD}_2\text{Cl}_2$ ):  $\delta$  59.2 (d,  $J_{\text{RhP}} = 163$ ).

$^{11}\text{B NMR}$  (160 MHz,  $\text{CD}_2\text{Cl}_2$ ):  $\delta$  24.5 (br,  $\text{BH}_2$ ),  $-6.6$  (s,  $[\text{BAr}^{\text{F}}_4]^-$ ).

ESI-MS ( $1,2\text{-C}_6\text{H}_4\text{F}_2$ ,  $60\text{ }^{\circ}\text{C}$ ) positive ion:  $m/z$  492.2548  $[\text{M}^+]$  (calc. 492.2565).

Elemental Microanalysis: Calc.  $[\text{C}_{50}\text{H}_{58}\text{B}_2\text{F}_{24}\text{NP}_2\text{Rh}]$  ( $1315.2897\text{ g mol}^{-1}$ ): C, 45.65; H, 4.44; N, 1.06. Found: C, 45.95; H, 4.10; N, 1.12.

### 3. Variable temperature NMR spectra of 4 and Eyring analysis

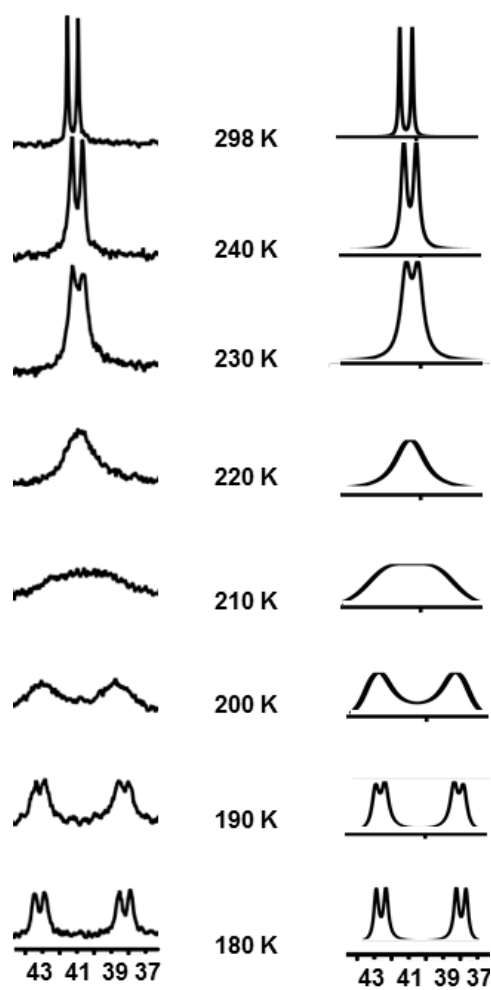

**Figure S2** Representative  $^{31}\text{P}\{^1\text{H}\}$  NMR spectra of  $[(\text{Rh}(\text{P}^i\text{Pr}_2(\text{CH}_2)_3\text{P}^i\text{Pr}_2))_2(\mu\text{-H})(\mu\text{-BH}_2\text{NH}_2)][\text{BAR}^{\text{F}}_4]$  (**4**) in THF at a range of temperatures (left) and their gNMR simulations (right).

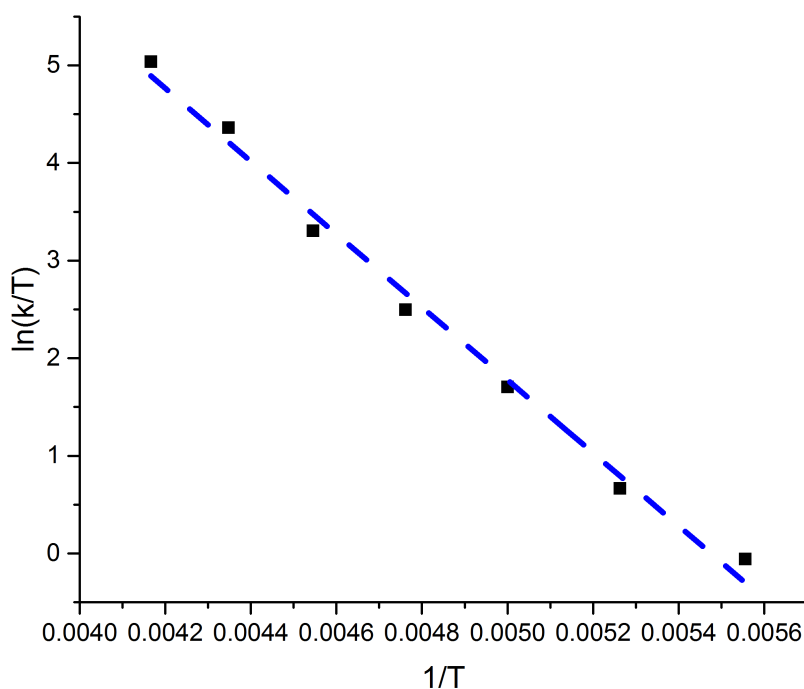

**Figure S3** Eyring analysis for  $[(\text{Rh}(\text{P}^i\text{Pr}_2(\text{CH}_2)_3\text{P}^i\text{Pr}_2))_2(\mu\text{-H})(\mu\text{-BH}_2\text{NH}_2)][\text{BAr}^{\text{F}}_4]$ .  $\ln(k/T) = -3736.85(1/T) + 20.46$

**Activation parameters derived from the Eyring plot for the fluxional nature of amino-borane:**

$$\Delta H^\ddagger = 31.1 \pm 1.3 \text{ kJ mol}^{-1}, \Delta S^\ddagger = -27.0 \pm 1.0 \text{ J K}^{-1} \text{ mol}^{-1}, \Delta G^\ddagger = 39.2 \pm 1.6 \text{ kJ mol}^{-1}.$$

**4. Stoichiometric reactions of  $\text{H}_3\text{B}\cdot\text{NH}_3$  with 1 and 2 in THF**

**Reaction with  $[\text{Rh}(\text{PPh}_2(\text{CH}_2)_3\text{PPh}_2)(\text{C}_6\text{H}_5\text{F})][\text{BAr}^{\text{F}}_4]$  (1)**

1.2 equivalents of  $\text{H}_3\text{B}\cdot\text{NH}_3$  was added to  $[\text{Rh}(\text{PPh}_2(\text{CH}_2)_3\text{PPh}_2)(\text{C}_6\text{H}_5\text{F})][\text{BAr}^{\text{F}}_4]$  (1, 20 mg,  $1.4 \times 10^{-2}$  mmol) in d-8 THF in a sealed NMR tube equipped with a J. Young's valve. NMR spectroscopy and ESI-MS after 2 minutes showed the formation of  $[(\text{Rh}(\text{PPh}_2(\text{CH}_2)_3\text{PPh}_2))_2(\mu\text{-H})(\mu\text{-BH}_2\text{NH}_2)][\text{BAr}^{\text{F}}_4]$  (3) as the only organometallic species.  $^{11}\text{B}$  NMR spectrum also showed the formation of  $[\text{BH}_2(\text{NH}_3)(\text{THF})][\text{BAr}^{\text{F}}_4]$  ( $^{11}\text{B}$  NMR:  $\delta$  0.5, t,  $J_{\text{BH}} = 108$ ).  $[(\text{Rh}(\text{PPh}_2(\text{CH}_2)_3\text{PPh}_2))_2(\mu\text{-H})(\mu\text{-BH}_2\text{NH}_2)][\text{BAr}^{\text{F}}_4]$  showed decomposition over time and after 4 h only 12% of  $[(\text{Rh}(\text{PPh}_2(\text{CH}_2)_3\text{PPh}_2))_2(\mu\text{-H})(\mu\text{-BH}_2\text{NH}_2)][\text{BAr}^{\text{F}}_4]$  was left, 30% of  $[\text{Rh}(\text{PPh}_2(\text{CH}_2)_3\text{PPh}_2)(\text{THF})_2][\text{BAr}^{\text{F}}_4]$  was also observed, rest being the uncharacterized complexes. Layering the THF solution (after 2 minutes of the reaction) with pentane at  $-18$  °C resulted in a small number of crystals which were sufficient for the single crystal X-ray diffraction but not for the reliable NMR data or elemental microanalysis.

### Spectral details after 2 minutes of reaction:

**$^1\text{H}$  NMR (500 MHz,  $d_8$ -THF):**  $\delta$  7.79 (s,  $[\text{BAr}^{\text{F}}_4]^-$ ), 7.57 (s,  $[\text{BAr}^{\text{F}}_4]^-$ ), 7.49 – 7.24 (overlapping m, Ph), 5.67 (br,  $\text{NH}_2$ ), 1.99 (br,  $\text{CH}_2$ ), -7.45 (s,  $\text{BH}_2$  and RhH). Signal at  $\delta$  -7.45 showed integral of 3H relative to the phenyl resonance.

**$^{31}\text{P}\{^1\text{H}\}$  NMR (202 MHz,  $d_8$ -THF):**  $\delta$  18.2 (d,  $J_{\text{RhP}} = 142$ ).

**$^{11}\text{B}$  NMR (160 MHz,  $d_8$ -THF):**  $\delta$  51.5 (br,  $\text{BH}_2$ ), -6.5 (s,  $[\text{BAr}^{\text{F}}_4]^-$ ), 0.5 (t,  $J_{\text{BH}} = 108$ , corresponding to  $[\text{BH}_2(\text{NH}_3)(\text{THF})][\text{BAr}^{\text{F}}_4]$ ).

**ESI-MS** (1,2- $\text{C}_6\text{H}_4\text{F}_2$ , 60 °C) positive ion:  $m/z$  1060.1612  $[\text{M}^+]$  (calc. 1060.1645).

### Reactions with $[\text{Rh}(\text{P}^i\text{Pr}_2(\text{CH}_2)_3\text{P}^i\text{Pr}_2)(\text{C}_6\text{H}_5\text{F})][\text{BAr}^{\text{F}}_4]$ (2)

THF (0.35 mL) was added to a sealed NMR tube equipped with a J. Young's valve and charged with  $[\text{Rh}(\text{P}^i\text{Pr}_2(\text{CH}_2)_3\text{P}^i\text{Pr}_2)(\text{C}_6\text{H}_5\text{F})][\text{BAr}^{\text{F}}_4]$  (16 mg,  $1.2 \times 10^{-2}$  mmol) and  $\text{H}_3\text{B}\cdot\text{NH}_3$  (~0.5 mg,  $1.4 \times 10^{-2}$  mmol). NMR spectroscopy after 2 minutes showed the formation of  $[\text{Rh}(\text{P}^i\text{Pr}_2(\text{CH}_2)_3\text{P}^i\text{Pr}_2)(\eta^2\text{-H}_3\text{B}\cdot\text{NH}_3)][\text{BAr}^{\text{F}}_4]$  and  $[(\text{Rh}(\text{P}^i\text{Pr}_2(\text{CH}_2)_3\text{P}^i\text{Pr}_2))_2(\mu\text{-H})(\mu\text{-BH}_2\text{NH}_2)][\text{BAr}^{\text{F}}_4]$  in a 7:3 ratio along with the formation of  $[\text{BH}_2(\text{NH}_3)(\text{THF})][\text{BAr}^{\text{F}}_4]$  ( $^{11}\text{B}$  NMR:  $\delta$  0.5, t,  $J_{\text{BH}} = 108$ ). Over time the concentration of the two complexes changes leading to a relative increment in the formation of  $[(\text{Rh}(\text{P}^i\text{Pr}_2(\text{CH}_2)_3\text{P}^i\text{Pr}_2))_2(\mu\text{-H})(\mu\text{-BH}_2\text{NH}_2)][\text{BAr}^{\text{F}}_4]$ . NMR spectroscopy after 1 h showed the presence of  $[\text{Rh}(\text{P}^i\text{Pr}_2(\text{CH}_2)_3\text{P}^i\text{Pr}_2)(\eta^2\text{-H}_3\text{B}\cdot\text{NH}_3)][\text{BAr}^{\text{F}}_4]$  and  $[(\text{Rh}(\text{P}^i\text{Pr}_2(\text{CH}_2)_3\text{P}^i\text{Pr}_2))_2(\mu\text{-H})(\mu\text{-BH}_2\text{NH}_2)][\text{BAr}^{\text{F}}_4]$  in a 6:4 ratio.

### Characteristic NMR signals corresponding to $[\text{Rh}(\text{P}^i\text{Pr}_2(\text{CH}_2)_3\text{P}^i\text{Pr}_2)(\eta^2\text{-H}_3\text{B}\cdot\text{NH}_3)][\text{BAr}^{\text{F}}_4]$

**$^1\text{H}$  NMR (500 MHz, THF):**  $\delta$  -1.65 (br, bound  $\text{BH}_2$ ).

**$^{31}\text{P}\{^1\text{H}\}$  NMR (202 MHz, THF):**  $\delta$  59.0 (d,  $J_{\text{RhP}} = 160$ ).

**$^{11}\text{B}$  NMR (160 MHz, THF):**  $\delta$  17.0 (br,  $\text{BH}_2$ ), -6.5 (s,  $[\text{BAr}^{\text{F}}_4]^-$ ), 0.5 (t,  $J_{\text{BH}} = 108$ , corresponding to  $[\text{BH}_2(\text{NH}_3)(\text{THF})][\text{BAr}^{\text{F}}_4]$ ).

### 5. Reaction of 4 equivalents of $\text{H}_3\text{B}\cdot\text{NH}_3$ with 2 in THF

THF (0.35 mL) was added to a sealed NMR tube charged with  $[\text{Rh}(\text{P}^i\text{Pr}_2(\text{CH}_2)_3\text{P}^i\text{Pr}_2)(\text{C}_6\text{H}_5\text{F})][\text{BAr}^{\text{F}}_4]$  (8 mg,  $0.6 \times 10^{-2}$  mmol) and  $\text{H}_3\text{B}\cdot\text{NH}_3$  (~0.7 mg,  $2.4 \times 10^{-2}$  mmol). NMR spectroscopy after 2 minutes showed the formation of  $[\text{Rh}(\text{P}^i\text{Pr}_2(\text{CH}_2)_3\text{P}^i\text{Pr}_2)(\eta^2\text{-H}_3\text{B}\cdot\text{NH}_3)][\text{BAr}^{\text{F}}_4]$  and  $[(\text{Rh}(\text{P}^i\text{Pr}_2(\text{CH}_2)_3\text{P}^i\text{Pr}_2))_2(\mu\text{-H})(\mu\text{-BH}_2\text{NH}_2)][\text{BAr}^{\text{F}}_4]$  in 1:3 ratio along with the formation of  $[\text{BH}_2(\text{NH}_3)(\text{THF})][\text{BAr}^{\text{F}}_4]$  ( $^{11}\text{B}$  NMR:  $\delta$  0.5, t,  $J_{\text{BH}}$



= 108). At this stage NMR signals due to free  $\text{H}_3\text{B}\cdot\text{NH}_3$  are broad in  $^{11}\text{B}$  NMR spectrum thus suggesting a rapid exchange between the bound and the free  $\text{H}_3\text{B}\cdot\text{NH}_3$ . After 10 minutes all  $[\text{Rh}(\text{P}^i\text{Pr}_2(\text{CH}_2)_3\text{P}^i\text{Pr}_2)(\eta^2\text{-H}_3\text{B}\cdot\text{NH}_3)][\text{BAR}^{\text{F}}_4]$  and  $[\text{BH}_2(\text{NH}_3)(\text{THF})][\text{BAR}^{\text{F}}_4]$  gets consumed and  $[(\text{Rh}(\text{P}^i\text{Pr}_2(\text{CH}_2)_3\text{P}^i\text{Pr}_2))_2(\mu\text{-H})(\mu\text{-BH}_2\text{NH}_2)][\text{BAR}^{\text{F}}_4]$  was found to be the only organometallic species detected by  $^{31}\text{P}\{^1\text{H}\}$  NMR spectroscopy. As the consumption of  $[\text{Rh}(\text{P}^i\text{Pr}_2(\text{CH}_2)_3\text{P}^i\text{Pr}_2)(\eta^2\text{-H}_3\text{B}\cdot\text{NH}_3)][\text{BAR}^{\text{F}}_4]$  reduced the opportunity of exchange between free and bound  $\text{H}_3\text{B}\cdot\text{NH}_3$ , free  $\text{H}_3\text{B}\cdot\text{NH}_3$  was observed as a quartet in  $^{11}\text{B}$  NMR spectrum ( $\delta$  -21.9, q,  $J_{\text{BH}} = 100$ ). After 24 h  $[(\text{Rh}(\text{P}^i\text{Pr}_2(\text{CH}_2)_3\text{P}^i\text{Pr}_2))_2(\mu\text{-H})(\mu\text{-BH}_2\text{NH}_2)][\text{BAR}^{\text{F}}_4]$  got almost completely consumed with the formation of  $[(\text{Rh}(\text{P}^i\text{Pr}_2(\text{CH}_2)_3\text{P}^i\text{Pr}_2))_2(\text{H})_2(\mu\text{-H})_3][\text{BAR}^{\text{F}}_4]^{\delta}$  and the same uncharacterized species ( $^{31}\text{P}\{^1\text{H}\}$  NMR:  $\delta$  56.0 and 51.0,  $J_{\text{RhP}} = \sim 111$  Hz) in 1:1 ratio, ratio remaining the same for the next 3 days.

## 6. General method for the catalytic dehydrocoupling (open system)

Rhodium catalyst (e.g. **1**, 8 mg,  $5.4 \times 10^{-3}$  mmol) and amine-borane (e.g.  $\text{H}_3\text{B}\cdot\text{NH}_2\text{Me}$ , 48 mg, 1.06 mmol,  $\sim 200$  equivalents) were added to a 3-necked Schlenk flask which was connected to an external mineral oil bubbler. Addition of solvent ( $1,2\text{-F}_2\text{C}_6\text{H}_4$  or THF, 2.6 mL) started the dehydrogenation experiment. Evolution of hydrogen gas vs. time was monitored by attaching a cannula to the Schlenk, the other end of cannula was placed under an upturned 50 mL burette filled with water.

## 7. Catalytic dehydrocoupling of $\text{H}_3\text{B}\cdot\text{NH}_3$ using 0.5 mol% **1** in THF

The reaction of  $[\text{Rh}(\text{PPh}_2(\text{CH}_2)_3\text{PPh}_2)(\text{C}_6\text{H}_5\text{F})][\text{BAR}^{\text{F}}_4]$  (**1**,  $2 \times 10^{-3}$  M) and  $\text{H}_3\text{B}\cdot\text{NH}_3$  (0.41 M) in THF as described in Section 6 immediately produced bubbles indicating the immediate start of the dehydrogenation process.  $\text{H}_3\text{B}\cdot\text{NH}_3$  was completely consumed in 3 h producing 1.2 equivalents of  $\text{H}_2$  gas and some insoluble solid.  $^{11}\text{B}$  NMR spectrum of the reaction mixture after 3 h showed the formation of borazine and polyborazylene along with the three unresolved broad signals at  $\delta$  -5.3, -12.8 and -24.6 which could possibly be due to the mixture of B-(cyclotriborazanyl)amine-borane (BCTB)<sup>9</sup> and short chain B-N oligomers. Insoluble solid was separated by filtration whose IR spectrum is suggestive of polyaminoborane reported by Manners and co-workers.<sup>10</sup> THF solution was then concentrated to which toluene was added to precipitate out the product. Product was purified by washing with toluene. The isolated product was characterized as the mixture of B-(cyclotriborazanyl)amine-borane (BCTB) and the short chain B-N oligomers<sup>11</sup> through the  $^{11}\text{B}$  NMR spectroscopy.

## Hydrogen evolution experiment:

95% conversion in 3h (TOF ~ 60 h<sup>-1</sup>): release of 1.25 equivalents of H<sub>2</sub>.

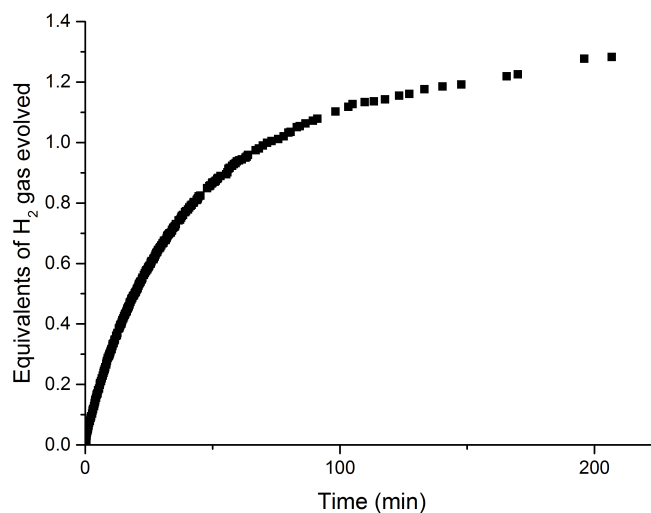

**Figure S4** Plot of equivalents of H<sub>2</sub> gas produced vs time during dehydrocoupling of H<sub>3</sub>B·NH<sub>3</sub> (0.41 M) using [Rh(PPh<sub>2</sub>(CH<sub>2</sub>)<sub>3</sub>PPh<sub>2</sub>)(C<sub>6</sub>H<sub>5</sub>F)][BAR<sup>F</sup><sub>4</sub>] (**1**, 2 × 10<sup>-3</sup> M, 0.5 mol%).

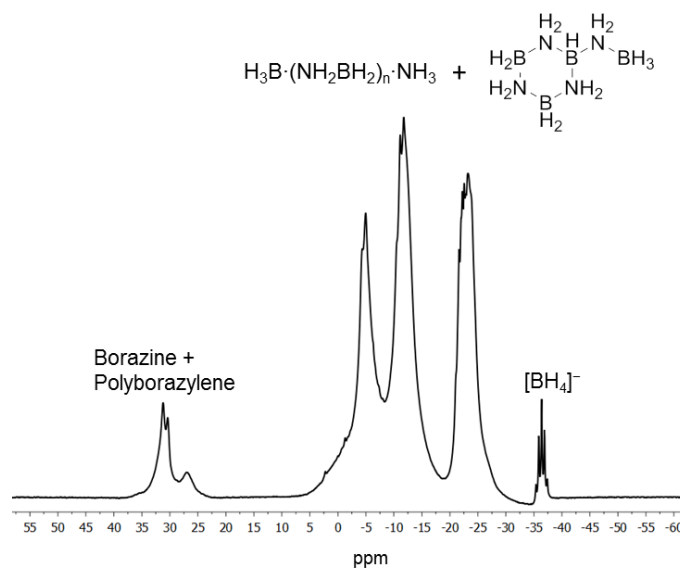

**Figure S5** <sup>11</sup>B NMR spectrum of the reaction mixture after 3 h of dehydrocoupling of H<sub>3</sub>B·NH<sub>3</sub> (0.41 M) using [Rh(PPh<sub>2</sub>(CH<sub>2</sub>)<sub>3</sub>PPh<sub>2</sub>)(C<sub>6</sub>H<sub>5</sub>F)][BAR<sup>F</sup><sub>4</sub>] (**1**, 2 × 10<sup>-3</sup> M, 0.5 mol%).

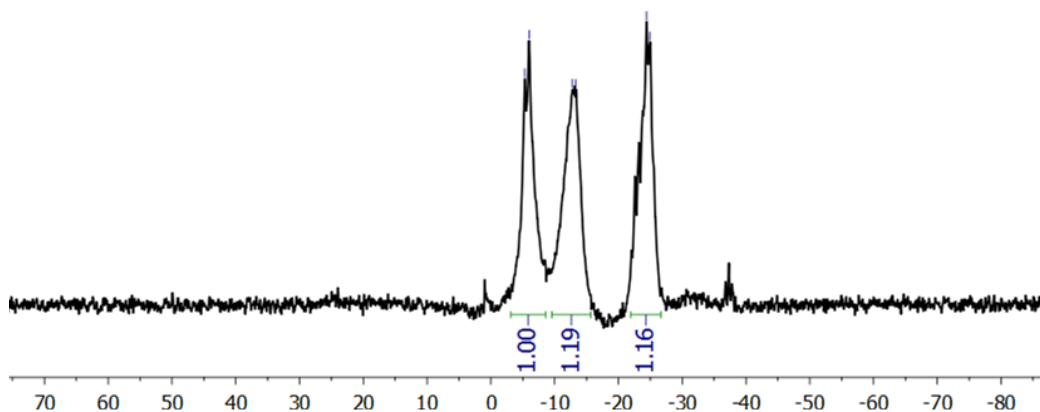

**Figure S6**  $^{11}\text{B}$  NMR spectrum of the isolated product from the catalytic dehydrocoupling of  $\text{H}_3\text{B}\cdot\text{NH}_3$  (0.41 M) using  $[\text{Rh}(\text{PPh}_2(\text{CH}_2)_3\text{PPh}_2)(\text{C}_6\text{H}_5\text{F})][\text{BAR}^{\text{F}}_4]$  ( $1, 2 \times 10^{-3}$  M, 0.5 mol %).

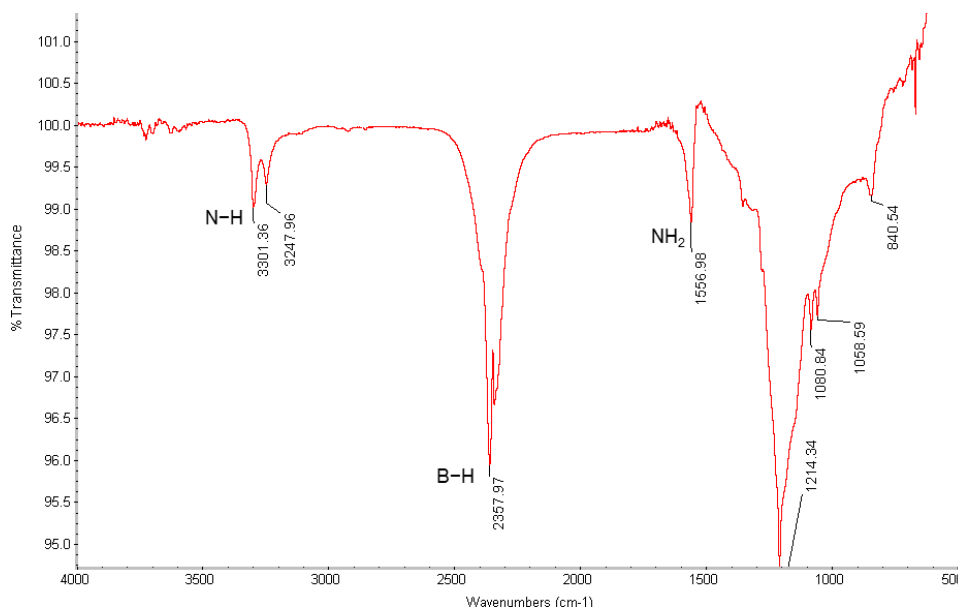

**Figure S7** IR spectrum of white insoluble product obtained from the dehydrocoupling of  $\text{H}_3\text{B}\cdot\text{NH}_3$  (0.41 M) using  $[\text{Rh}(\text{PPh}_2(\text{CH}_2)_3\text{PPh}_2)(\text{C}_6\text{H}_5\text{F})][\text{BAR}^{\text{F}}_4]$  ( $1, 2 \times 10^{-3}$  M, 0.5 mol %).

## 8. Catalytic dehydrogenation of $\text{H}_3\text{B}\cdot\text{NH}_3$ using 0.5 mol%

### $[\text{BH}_2(\text{NH}_3)(\text{OEt}_2)][\text{BAR}^{\text{F}}_4]$ in THF

No dehydrogenation was observed on reaction of  $\text{H}_3\text{B}\cdot\text{NH}_3$  (0.41 M) with  $[\text{BH}_2(\text{NH}_3)(\text{OEt}_2)][\text{BAR}^{\text{F}}_4]$  ( $2 \times 10^{-3}$  M, 0.5 mol%) as monitored by the gas-burette method for 3 h.  $^{11}\text{B}$  NMR spectrum after 3 h showed only the signals corresponding to  $\text{H}_3\text{B}\cdot\text{NH}_3$  ( $\delta$  -21.9, q,  $J_{\text{BH}} = 100$ ).

## 9. Catalytic dehydrocoupling of $\text{H}_3\text{B}\cdot\text{NH}_3$ using **2** (4 mol%) or $[\{\text{Rh}(\text{P}^i\text{Pr}_2(\text{CH}_2)_3\text{P}^i\text{Pr}_2)\}_2(\text{H})_2(\mu\text{-H})_3][\text{BAR}^{\text{F}}_4]$ (2 mol%) in THF in a closed system

The catalytic dehydrocoupling of  $\text{H}_3\text{B}\cdot\text{NH}_3$  was conducted using  $[\text{Rh}(\text{P}^i\text{Pr}_2(\text{CH}_2)_3\text{P}^i\text{Pr}_2)(\text{C}_6\text{H}_5\text{F})][\text{BAR}^{\text{F}}_4]$  (**2**) (4 mol%) or  $[\{\text{Rh}(\text{P}^i\text{Pr}_2(\text{CH}_2)_3\text{P}^i\text{Pr}_2)\}_2(\text{H})_2(\mu\text{-H})_3][\text{BAR}^{\text{F}}_4]$  (2 mol%) in THF in a sealed NMR tube. Complex **2** gave ~50% conversion while  $[\{\text{Rh}(\text{P}^i\text{Pr}_2(\text{CH}_2)_3\text{P}^i\text{Pr}_2)\}_2(\text{H})_2(\mu\text{-H})_3][\text{BAR}^{\text{F}}_4]$  resulted in ~30% conversion of  $\text{H}_3\text{B}\cdot\text{NH}_3$  in 10 h (Figure S8).  $^{11}\text{B}$  NMR spectroscopy showed the formation of a mixture of species containing borazine, B-(cyclotriborazanyl)amine-borane<sup>9</sup> and short chain B-N oligomers. A broad unidentified resonance at  $\delta$  -43 was also observed in the  $^{11}\text{B}$  NMR spectrum at the end of both dehydrocoupling experiments.

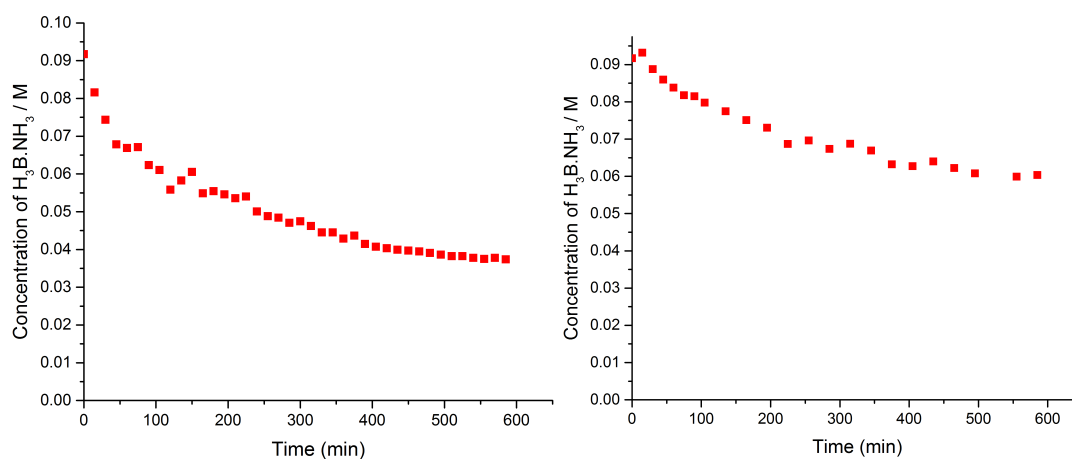

**Figure S8** Comparison plots of concentration of  $\text{H}_3\text{B}\cdot\text{NH}_3$  against time for the catalytic dehydrocoupling of  $\text{H}_3\text{B}\cdot\text{NH}_3$  ( $9 \times 10^{-2}$  M) in THF (sealed system). Left: complex **2** ( $3.6 \times 10^{-3}$  M, 4 mol%); Right:  $[\{\text{Rh}(\text{P}^i\text{Pr}_2(\text{CH}_2)_3\text{P}^i\text{Pr}_2)\}_2(\text{H})_2(\mu\text{-H})_3][\text{BAR}^{\text{F}}_4]$  ( $1.7 \times 10^{-3}$  M, 2 mol%).

## 10. Catalytic dehydrocoupling of $\text{H}_3\text{B}\cdot\text{NH}_3$ using **2** (4 mol%) or **4** (2 mol%) in THF in a closed system

$\text{H}_3\text{B}\cdot\text{NH}_3$  ( $9 \times 10^{-2}$  M in THF) and the appropriate rhodium complex (**2**, 4 mol% or **4**, 2 mol%) were added to a sealed NMR tube and the reaction progress was monitored using  $^{11}\text{B}$  NMR spectroscopy. Catalyst **2** resulted in ~50% conversion of  $\text{H}_3\text{B}\cdot\text{NH}_3$  to the mixture of dehydrocoupling products containing polyaminoborane, borazine, B-(cyclotriborazanyl)amine-borane (BCTB)<sup>9</sup> and polyborazylene in 10 h whereas **4** resulted in 70% conversion of  $\text{H}_3\text{B}\cdot\text{NH}_3$  in 10 h, yielding the same dehydrocoupling products as obtained with **2**.

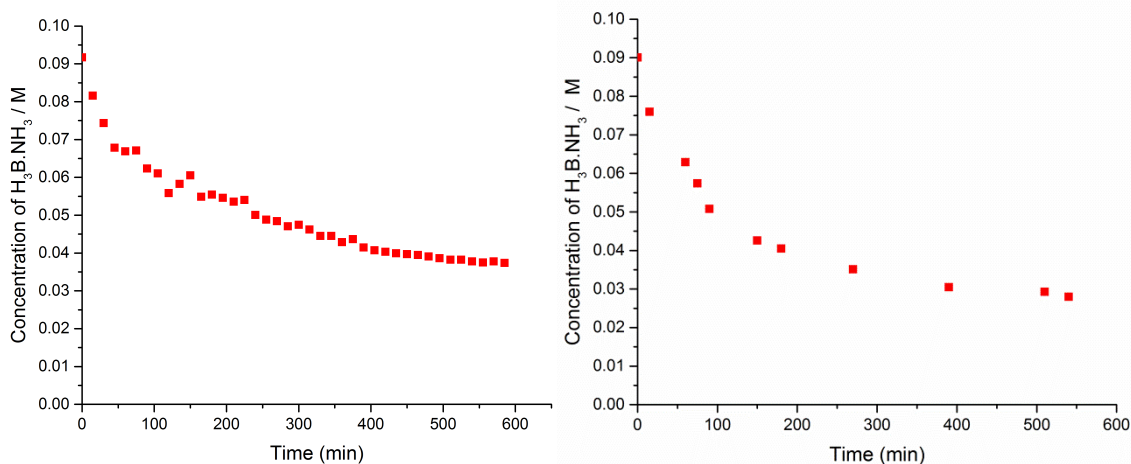

**Figure S9** Comparison plots of concentration of H<sub>3</sub>B·NH<sub>3</sub> against time for the catalytic dehydrocoupling of H<sub>3</sub>B·NH<sub>3</sub> (initial concentration:  $9 \times 10^{-2}$  M) in THF (sealed system). Left: using complex **2** ( $3.6 \times 10^{-3}$  M, 4 mol %; see Fig. S8); Right: using complex **4** ( $1.7 \times 10^{-3}$  M, 2 mol%).

We suggest that the drop off in catalytic activity of **2** and **4** is due to the catalyst deactivation by the presence of excess H<sub>2</sub> leading to the formation of a less active catalyst  $[\{\text{Rh}(\text{P}^i\text{Pr}_2(\text{CH}_2)_3\text{P}^i\text{Pr}_2)\}_2(\text{H})_2(\mu\text{-H})_3][\text{BAR}^{\text{F}_4}]$ , which has been shown to be a final product of reaction with excess H<sub>3</sub>B·NH<sub>3</sub> on a sealed system and also to form on direct addition of H<sub>2</sub> to **4**. To probe the role of H<sub>2</sub> the dehydrocoupling of H<sub>3</sub>B·NH<sub>3</sub> was monitored using <sup>11</sup>B NMR spectroscopy in a sealed system under the same catalytic condition: H<sub>3</sub>B·NH<sub>3</sub>,  $9 \times 10^{-2}$  M; **2**, 4 mol%; THF. Almost 50% conversion of H<sub>3</sub>B·NH<sub>3</sub> was obtained in 3.5 h after which the sample was degassed using freeze-pump-thaw method. Further monitoring the reaction using <sup>11</sup>B NMR spectroscopy revealed that the rate of dehydrogenation after degassing is faster than the rate just before degassing (Figure S10). We speculate this is because on degassing, the deactivated catalyst  $[\{\text{Rh}(\text{P}^i\text{Pr}_2(\text{CH}_2)_3\text{P}^i\text{Pr}_2)\}_2(\text{H})_2(\mu\text{-H})_3][\text{BAR}^{\text{F}_4}]$  reforms  $[\{\text{Rh}(\text{P}^i\text{Pr}_2(\text{CH}_2)_3\text{P}^i\text{Pr}_2)\}_2(\mu\text{-H})(\mu\text{-BH}_2\text{NH}_2)][\text{BAR}^{\text{F}_4}]$  (**4**) which shows greater catalytic activity. Consistent with the regeneration of a more active catalyst in the absence of H<sub>2</sub>, addition of two equivalents of H<sub>3</sub>B·NH<sub>3</sub> to pure  $[\{\text{Rh}(\text{P}^i\text{Pr}_2(\text{CH}_2)_3\text{P}^i\text{Pr}_2)\}_2(\text{H})_2(\mu\text{-H})_3][\text{BAR}^{\text{F}_4}]$  resulted in the immediate formation of  $[\{\text{Rh}(\text{P}^i\text{Pr}_2(\text{CH}_2)_3\text{P}^i\text{Pr}_2)\}_2(\mu\text{-H})(\mu\text{-BH}_2\text{NH}_2)][\text{BAR}^{\text{F}_4}]$  (**4**, 42%) and some uncharacterized organometallic complexes (12%), with the rest being the starting complex  $[\{\text{Rh}(\text{P}^i\text{Pr}_2(\text{CH}_2)_3\text{P}^i\text{Pr}_2)\}_2(\text{H})_2(\mu\text{-H})_3][\text{BAR}^{\text{F}_4}]$  (46%), as observed by the <sup>31</sup>P{<sup>1</sup>H} NMR spectroscopy. The H<sub>3</sub>B·NH<sub>3</sub> was completely converted to borazine and polyaminoborane in 24 h. The <sup>31</sup>P{<sup>1</sup>H} NMR spectrum at this point showed the presence of **4** (23%),  $[\{\text{Rh}(\text{P}^i\text{Pr}_2(\text{CH}_2)_3\text{P}^i\text{Pr}_2)\}_2(\text{H})_2(\mu\text{-H})_3][\text{BAR}^{\text{F}_4}]$  (43%) and some uncharacterized organometallic complexes (34%). This experiment, combined with the reaction of **4** with hydrogen to form  $[\{\text{Rh}(\text{P}^i\text{Pr}_2(\text{CH}_2)_3\text{P}^i\text{Pr}_2)\}_2(\text{H})_2(\mu\text{-H})_3][\text{BAR}^{\text{F}_4}]$ , suggests an equilibrium is established between

$[\{\text{Rh}(\text{P}^i\text{Pr}_2(\text{CH}_2)_3\text{P}^i\text{Pr}_2)\}_2(\text{H})_2(\mu\text{-H})_3][\text{BAR}^{\text{F}}_4]$  and **4** that is biased, respectively, by  $\text{H}_2$  and  $\text{H}_3\text{B}\cdot\text{NH}_3$ .

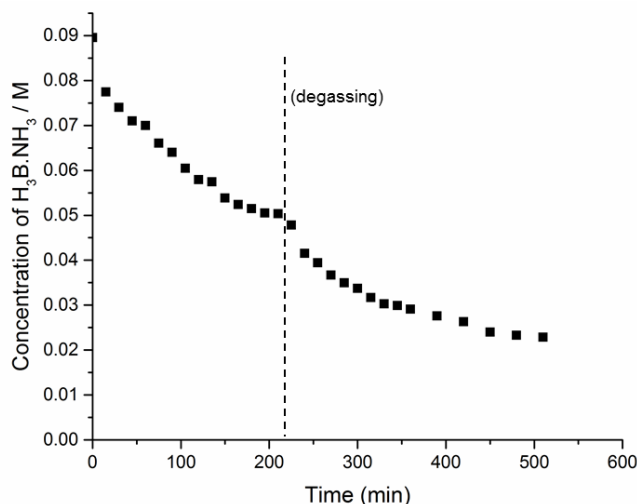

**Figure S10** Plot of concentration of  $\text{H}_3\text{B}\cdot\text{NH}_3$  against time for the dehydrocoupling of  $\text{H}_3\text{B}\cdot\text{NH}_3$  ( $9 \times 10^{-2}$  M) using catalyst **2** ( $3.6 \times 10^{-3}$  M, 4 mol%) in THF (sealed system). After 3.5 h, the system was opened to an Ar atmosphere, freeze-pump-thaw degassed and closed.

## 11. Reactivity of $\text{H}_3\text{B}\cdot\text{NH}_2\text{Me}$ with **1** in THF: Formation of **8**

1 equivalent of  $\text{H}_3\text{B}\cdot\text{NH}_2\text{Me}$  was added to  $[\text{Rh}(\text{PPh}_2(\text{CH}_2)_3\text{PPh}_2)(\text{C}_6\text{H}_5\text{F})][\text{BAR}^{\text{F}}_4]$  (**1**) in THF in a sealed NMR tube. NMR spectroscopy and ESI-MS ( $m/z$  1074.1340  $[\text{M}^+]$ , calc. 1074.1801) after 2 minutes showed the characteristic signals corresponding to the formation of  $[(\text{Rh}(\text{PPh}_2(\text{CH}_2)_3\text{PPh}_2))_2(\mu\text{-H})(\mu\text{-BH}_2\text{NHMe})][\text{BAR}^{\text{F}}_4]$  (**8**) as the only organometallic compound.  $^1\text{H}$  NMR showed signal at  $\delta$  -6.84 (s, 3H, relative to the phenyl groups) corresponding to bound hydrides ( $\text{BH}_2$  and RhH).  $^{31}\text{P}\{^1\text{H}\}$  NMR spectroscopy showed two broad signals at  $\delta$  22.2 and 21.5 both integrating one relative to each other. Bound  $\text{H}_2\text{B}=\text{NHMe}$  unit was observed at  $\delta$  50.6 in  $^{11}\text{B}$  NMR spectrum. Signal corresponding to  $[\text{BH}_2(\text{NH}_2\text{Me})(\text{THF})][\text{BAR}^{\text{F}}_4]$  was also observed in  $^{11}\text{B}$  NMR spectrum at  $\delta$  2.8 (t,  $J_{\text{BH}} = 123$ ) which is consistent with  $[\text{BH}_2(\text{NH}_2\text{Me})(\text{OEt}_2)][\text{B}(\text{C}_6\text{F}_5)_4]$  reported by Manners and co-workers [ $\text{CD}_2\text{Cl}_2$ ,  $\delta$  1.7 (t,  $J_{\text{BH}} = 121$ )].<sup>12</sup>

## 12. Reactivity of $\text{H}_3\text{B}\cdot\text{NH}_2\text{Me}$ with **1** in 1,2- $\text{F}_2\text{C}_6\text{H}_4$ : Formation of **8**

### With 1.2 eq of $\text{H}_3\text{B}\cdot\text{NH}_2\text{Me}$

1.2 equivalents of  $\text{H}_3\text{B}\cdot\text{NH}_2\text{Me}$  was added to  $[\text{Rh}(\text{PPh}_2(\text{CH}_2)_3\text{PPh}_2)(\text{C}_6\text{H}_5\text{F})][\text{BAR}^{\text{F}}_4]$  (**1**) in 1,2- $\text{F}_2\text{C}_6\text{H}_4$  in a sealed NMR tube. NMR spectroscopy after 2 minutes showed the formation of the dimer,  $[(\text{Rh}(\text{PPh}_2(\text{CH}_2)_3\text{PPh}_2))_2(\mu\text{-H})(\mu\text{-BH}_2\text{NHMe})][\text{BAR}^{\text{F}}_4]$  (**8**) in 5% yield, the rest being the starting complex **1**.  $^{11}\text{B}$  NMR spectrum showed signal at  $\delta$  -7.7 (t,  $J_{\text{BH}} = 115$ ), suggestive

of the formation of  $[(\text{NH}_2\text{Me})_2\text{BH}_2][\text{BAr}^{\text{F}}_4]$ .<sup>13,14</sup> Formation of the bridged species  $\text{H}_2\text{B}(\mu\text{-H})(\text{NMeH})\text{BH}_2$  [ $\delta$  -22.0, td,  $J_{\text{HB}} = 32$  and  $130$ ]<sup>15</sup> was also observed through  $^{11}\text{B}$  NMR spectroscopy. Formation of  $[(\text{NH}_2\text{Me})_2\text{BH}_2][\text{BAr}^{\text{F}}_4]$  could result from the reaction of  $[\text{BH}_2(\text{NH}_2\text{Me})(\text{S})][\text{BAr}^{\text{F}}_4]$  (S = solvent)\* with  $\text{NH}_2\text{Me}$  resulting from the B-N cleavage of  $\text{H}_3\text{B}\cdot\text{NH}_2\text{Me}$  as previously reported during Pt (II) catalysed dehydrocoupling of  $\text{H}_3\text{B}\cdot\text{NMe}_2\text{H}$ .<sup>14</sup>  $\text{BH}_3$ , can then react with the amino-borane  $\text{H}_2\text{B}=\text{NHMe}$  or  $\text{H}_3\text{B}\cdot\text{NH}_2\text{Me}$  (release  $\text{H}_2$ ) to form  $(\text{BH}_2)_2\text{NMeH}(\mu\text{-H})$ . After 24 h,  $^{31}\text{P}\{^1\text{H}\}$  NMR spectra shows complex **1** as the only organometallic compound present in the reaction mixture.  $^{11}\text{B}$  NMR spectroscopy shows the formation of borazine and  $[(\text{NH}_2\text{Me})_2\text{BH}_2][\text{BAr}^{\text{F}}_4]$ .

\*Formation of  $[\text{BH}_2(\text{NH}_2\text{Me})(\text{S})][\text{BAr}^{\text{F}}_4]$  is observed as an intermediate during the formation of **8** in nucleophilic solvents, for example THF or  $\text{Et}_2\text{O}$  (Scheme 5).

### With 4 eq of $\text{H}_3\text{B}\cdot\text{NH}_2\text{Me}$

4 equivalents of  $\text{H}_3\text{B}\cdot\text{NH}_2\text{Me}$  was added to  $[\text{Rh}(\text{PPh}_2(\text{CH}_2)_3\text{PPh}_2)(\text{C}_6\text{H}_5\text{F})][\text{BAr}^{\text{F}}_4]$  (**1**) in 1,2- $\text{F}_2\text{C}_6\text{H}_4$  in a sealed NMR tube. NMR spectroscopy after 2 minutes showed the formation of the dimer,  $[(\text{Rh}(\text{PPh}_2(\text{CH}_2)_3\text{PPh}_2))_2(\mu\text{-H})(\mu\text{-BH}_2\text{NHMe})][\text{BAr}^{\text{F}}_4]$  (**8**) in 90% yield and some uncharacterized complex (~10% yield). Formation of  $[\text{Rh}(\text{PPh}_2(\text{CH}_2)_3\text{PPh}_2)(\eta^2\text{-H}_3\text{B}\cdot\text{NH}_2\text{Me})][\text{BAr}^{\text{F}}_4]$  was not observed.  $^{11}\text{B}$  NMR spectroscopy showed the formation of the cyclic product  $(\text{BH}_2)_2\text{NMeH}(\mu\text{-H})$  and polymethylaminoborane ( $\delta$  br, -5.5). Signal due to  $[(\text{NH}_2\text{Me})_2\text{BH}_2][\text{BAr}^{\text{F}}_4]$  in the  $^{11}\text{B}$  NMR spectrum is obscured by the broad signal of the polymer. NMR spectra after 20 minutes showed complete decomposition of the dimer (**8**) to give some uncharacterized complexes.

## 13. Catalytic dehydrocoupling of $\text{H}_3\text{B}\cdot\text{NH}_2\text{Me}$ using 0.5 mol% **1** in

### THF

1.15 equivalents of  $\text{H}_2$  gas was released as measured by the gas burette method as described in general experimental procedure (Section 6).

Formation of polyaminoborane  $[\text{H}_2\text{BNMeH}]_n$ , (~95%) and borazine  $[\text{HBNMe}]_3$ , (~5%) was observed through  $^{11}\text{B}$  NMR spectroscopy.

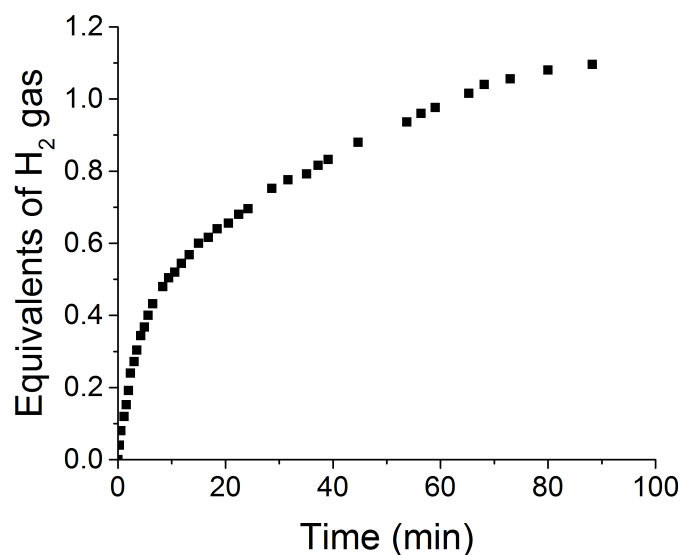

**Figure S11** Plot of equivalents of H<sub>2</sub> gas produced vs time during the dehydrocoupling of H<sub>3</sub>B·NH<sub>2</sub>Me (0.41 M) using [Rh(PPh<sub>2</sub>(CH<sub>2</sub>)<sub>3</sub>PPh<sub>2</sub>)(C<sub>6</sub>H<sub>5</sub>F)][BAR<sup>F</sup><sub>4</sub>] (**1**, 2 × 10<sup>-3</sup> M, 0.5 mol%) in THF.

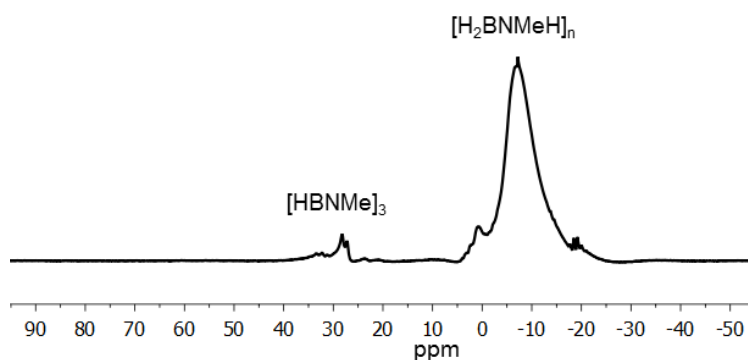

**Figure S12** <sup>11</sup>B NMR spectrum at the end of the catalytic dehydrocoupling of H<sub>3</sub>B·NH<sub>2</sub>Me (0.41 M) using [Rh(PPh<sub>2</sub>(CH<sub>2</sub>)<sub>3</sub>PPh<sub>2</sub>)(C<sub>6</sub>H<sub>5</sub>F)][BAR<sup>F</sup><sub>4</sub>] (**1**, 2 × 10<sup>-3</sup> M, 0.5 mol%) in THF.

Polymer from the catalytic dehydrocoupling of H<sub>3</sub>B·NH<sub>2</sub>Me (0.41 M) using **III** (2 × 10<sup>-3</sup> M, 0.5 mol%, THF) was isolated as per the literature procedure<sup>5</sup> by precipitating it in the hexane solvent and then subsequent filtration, washing with hexane and drying steps. Yield: 18 mg, 40%.



## GPC data

$M_w = 30,600$ ;  $M_n = 11,740$ ;  $\bar{D} = 2.6$ .

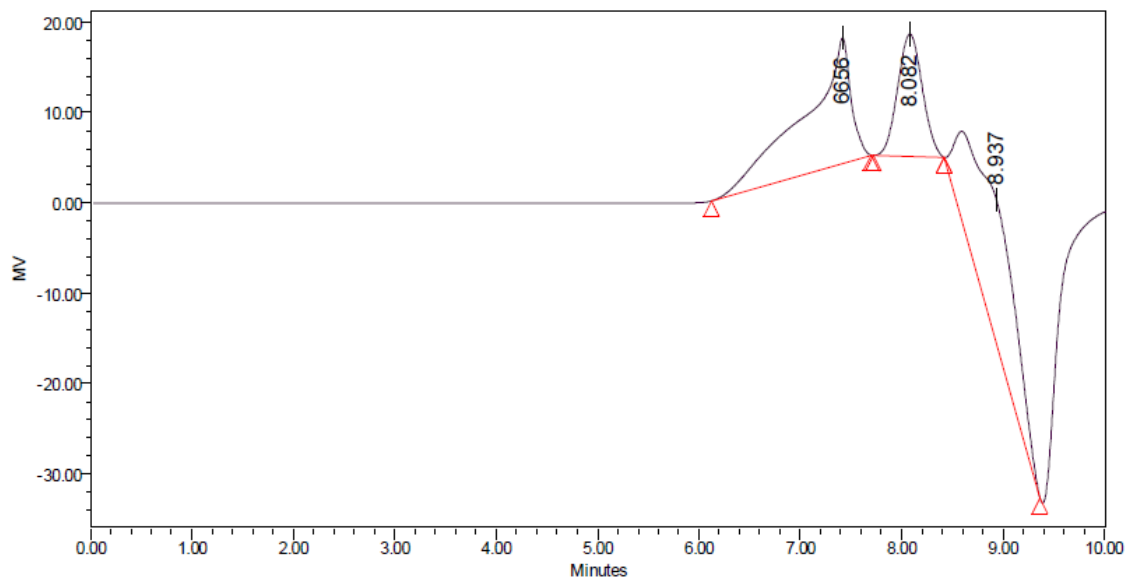

**Figure S13** Gel permeation chromatogram (plot of refractive index response against time) for the isolated polymer. The peak at  $t = 8.082$  is a system peak.

## 14. Catalytic dehydrocoupling of $\text{H}_3\text{B}\cdot\text{NH}_2\text{Me}$ using 0.5 mol% **1** in $1,2\text{-F}_2\text{C}_6\text{H}_4$

1.1 equivalents of  $\text{H}_2$  gas was released as measured by the gas burette method as described in general experimental procedure (Section 6).

Formation of polyaminoborane ( $[\text{H}_2\text{BNMeH}]_n$ , ~95 %) and borazine ( $[\text{HBNMe}]_3$ , ~5 %) was observed through the  $^{11}\text{B}$  NMR spectroscopy.

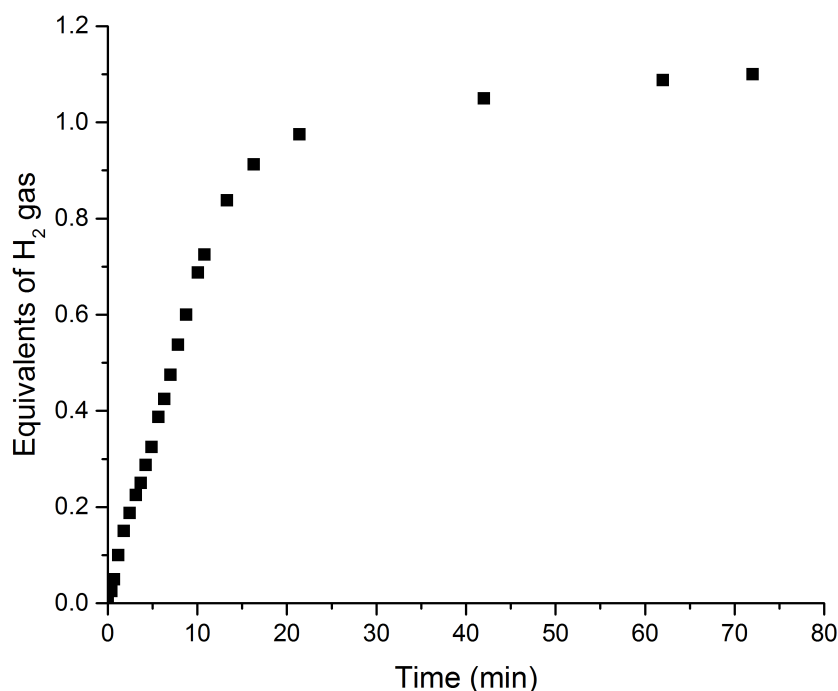

**Figure S14** Plot of equivalents of H<sub>2</sub> gas produced vs time during dehydrocoupling of H<sub>3</sub>B·NH<sub>2</sub>Me (0.41 M) using [Rh(PPh<sub>2</sub>(CH<sub>2</sub>)<sub>3</sub>PPh<sub>2</sub>)(C<sub>6</sub>H<sub>5</sub>F)][BAR<sup>F</sup><sub>4</sub>] (**1**, 2 × 10<sup>-3</sup> M, 0.5 mol %) in 1,2-F<sub>2</sub>C<sub>6</sub>H<sub>4</sub>.

### 15. Preparation (*in situ*) of **8** in THF

1 equivalent of H<sub>3</sub>B·NH<sub>2</sub>Me (1 mg, 0.022 mmol) was added to [Rh(PPh<sub>2</sub>(CH<sub>2</sub>)<sub>3</sub>PPh<sub>2</sub>)(C<sub>6</sub>H<sub>5</sub>F)][BAR<sup>F</sup><sub>4</sub>] (**1**, 32 mg, 0.022 mmol) in THF (0.5 mL) in a Schlenk flask. Reaction mixture was stirred for two minutes, evacuated, washed with pentane and then dried to obtain orange powder of **8**. [BH<sub>2</sub>(NH<sub>2</sub>Me)(THF)][BAR<sup>F</sup><sub>4</sub>] was also present in the obtained solid. The orange solid was then used as catalyst for the H<sub>3</sub>B·NH<sub>2</sub>Me dehydrocoupling experiments.

### 16. Catalytic dehydrocoupling of H<sub>3</sub>B·NH<sub>2</sub>Me using *in situ* prepared **8** (0.25 mol%) in THF

1.13 equivalents of H<sub>2</sub> gas was released as measured by gas burette method as described in general experimental procedure (Section 6).

Formation of polyaminoborane ([H<sub>2</sub>BNMeH]<sub>n</sub>, ~95%) and borazine ([HBNMe]<sub>3</sub>, ~5%) was observed through <sup>11</sup>B NMR spectroscopy.

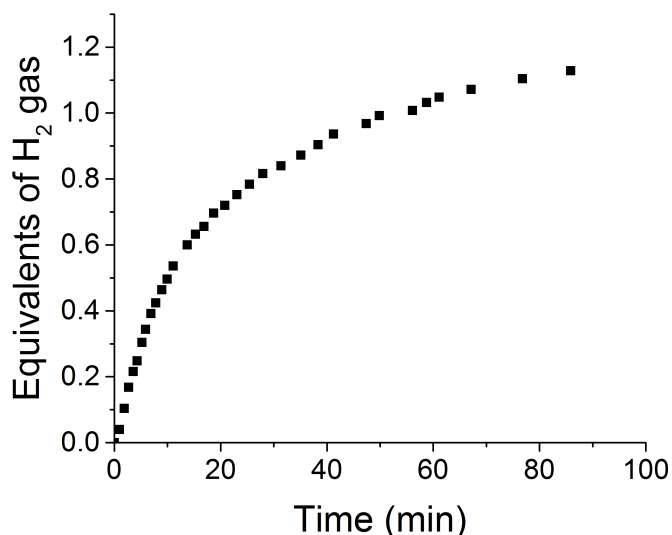

**Figure S15** Plot of equivalents of H<sub>2</sub> gas produced vs time during dehydrocoupling of H<sub>3</sub>B·NH<sub>2</sub>Me (0.41 M) using *in situ* prepared **8** ( $1 \times 10^{-3}$  M, 0.25 mol%) in THF.

## 17. Catalytic dehydrocoupling of H<sub>3</sub>B·NH<sub>2</sub>Me using *in situ* prepared **8** (0.25 mol%) in 1,2-F<sub>2</sub>C<sub>6</sub>H<sub>4</sub>

1.12 equivalents of H<sub>2</sub> gas was released as measured by the gas burette method as described in general experimental procedure (Section 6).

Formation of polyaminoborane ([H<sub>2</sub>BNMeH]<sub>n</sub>, ~95%) and borazine ([HBNMe]<sub>3</sub>, ~5%) was observed through the <sup>11</sup>B NMR spectroscopy.

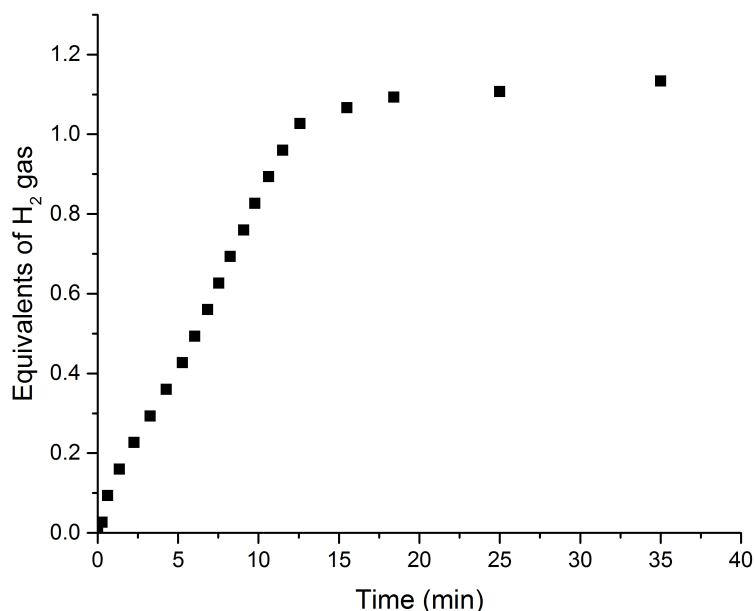

**Figure S16** Plot of equivalents of H<sub>2</sub> gas produced vs time during dehydrocoupling of H<sub>3</sub>B·NH<sub>2</sub>Me (0.41 M) using *in situ* prepared **8** ( $1 \times 10^{-3}$  M, 0.25 mol%) in 1,2-F<sub>2</sub>C<sub>6</sub>H<sub>4</sub>.

## 18. Catalytic dehydrocoupling of $\text{H}_3\text{B}\cdot\text{NMe}_2\text{H}$ in $1,2\text{-F}_2\text{C}_6\text{H}_4$

0.7 mL solution of **1** ( $2 \times 10^{-3}$  M, 0.5 mol %) in  $1,2\text{-F}_2\text{C}_6\text{H}_4$  was added to  $\text{H}_3\text{B}\cdot\text{NMe}_2\text{H}$  (0.41 M) and the evolution of hydrogen gas was measured using gas-burette method which showed the release of one equivalent of  $\text{H}_2$  gas in 30 minutes. The temporal plot of evolution of hydrogen gas (Figure S17) shows a sigmoidal profile with a slow release of 0.3 equivalent of  $\text{H}_2$  gas in the first 10 minutes followed by a highly rapid release of 0.6 equivalent of  $\text{H}_2$  gas in the next 2.5 minutes and then a very slow evolution of 0.1 equivalent of  $\text{H}_2$  gas in the next 18 minutes.  $^{11}\text{B}$  NMR spectroscopy at the end of the reaction (30 minutes) showed the complete conversion of  $\text{H}_3\text{B}\cdot\text{NMe}_2\text{H}$  to  $[\text{H}_2\text{BNMe}_2]_2$ . The slow release of hydrogen gas at the start (10 minutes) can be attributed to the induction period. We suggest that the induction period is related to the slow formation of the dimer  $[\{\text{Rh}(\text{PPh}_2(\text{CH}_2)_3\text{PPh}_2)\}_2(\mu\text{-H})(\mu\text{-BH}_2\text{NMe}_2)][\text{BAR}^{\text{F}}_4]$  from **1**, but cannot discount that  $[\{\text{Rh}(\text{PPh}_2(\text{CH}_2)_3\text{PPh}_2)\}_2(\mu\text{-H})(\mu\text{-BH}_2\text{NMe}_2)][\text{BAR}^{\text{F}}_4]$  is a precatalyst. The observation of induction period (measured by  $^{11}\text{B}$  NMR spectroscopy) as well as the homogeneous nature of the catalysis for this reaction (i.e. the dehydrocoupling of  $\text{H}_3\text{B}\cdot\text{NMe}_2\text{H}$  (0.07 M) to form  $[\text{H}_2\text{BNMe}_2]_2$  using **1** as the catalyst in  $1,2\text{-F}_2\text{C}_6\text{H}_4$  solvent) has been previously reported and support the observation of induction period from the hydrogen evolution experiment described here.<sup>5</sup>

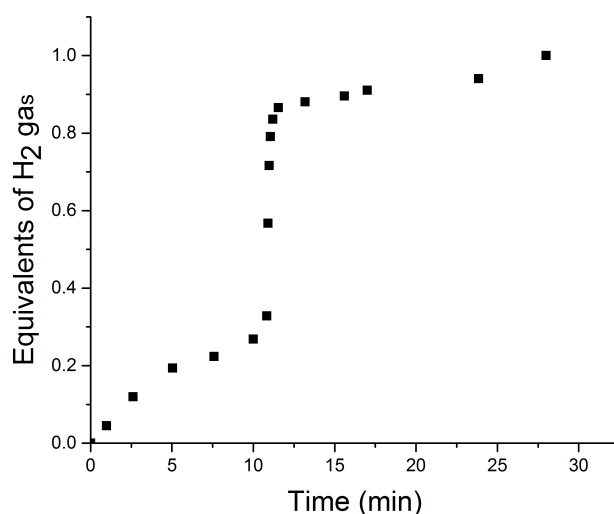

**Figure S17** Plot of equivalents of  $\text{H}_2$  gas produced vs time during dehydrocoupling of  $\text{H}_3\text{B}\cdot\text{NMe}_2\text{H}$  (0.41 M) using  $[\text{Rh}(\text{PPh}_2(\text{CH}_2)_3\text{PPh}_2)(\text{C}_6\text{H}_5\text{F})][\text{BAR}^{\text{F}}_4]$  (**1**,  $2 \times 10^{-3}$  M, 0.5 mol%) in  $1,2\text{-F}_2\text{C}_6\text{H}_4$ .

When dehydrocoupling of  $\text{H}_3\text{B}\cdot\text{NMe}_2\text{H}$  in  $1,2\text{-F}_2\text{C}_6\text{H}_4$  was studied in a sealed NMR tube, an induction period of 6 minutes was observed using complex **1** (4 mol%) as the catalyst while no induction period was observed when *in situ* prepared  $[\{\text{Rh}(\text{PPh}_2(\text{CH}_2)_3\text{PPh}_2)\}_2(\mu\text{-H})(\mu\text{-BH}_2\text{NMe}_2)][\text{BAR}^{\text{F}}_4]$  (2 mol%, Rh) was used as the catalyst (Figure S18).

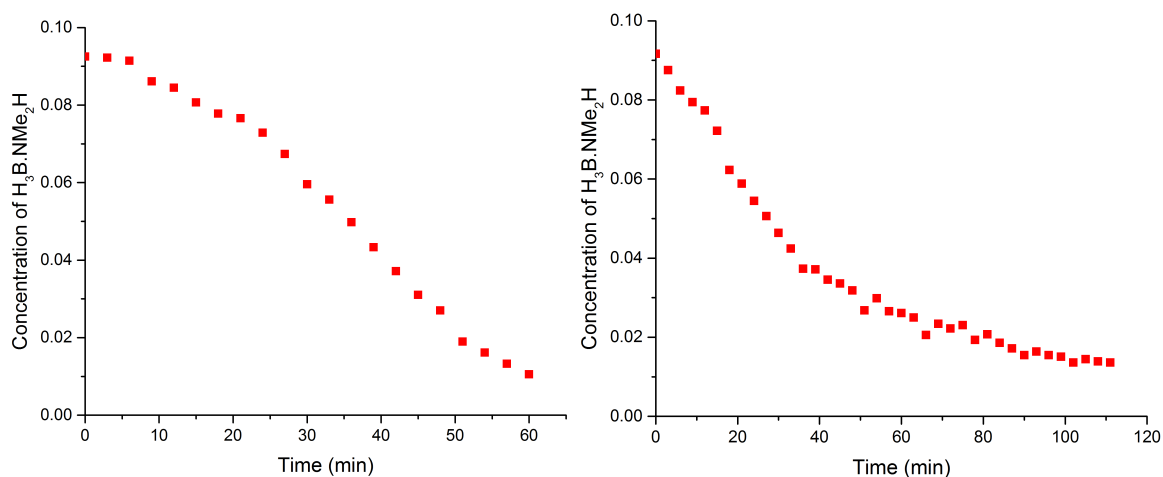

**Figure S18** Plots of concentration (M) against time for the catalytic dehydrocoupling of H<sub>3</sub>B·NMe<sub>2</sub>H ( $9 \times 10^{-2}$  M) in 1,2-F<sub>2</sub>C<sub>6</sub>H<sub>4</sub> (sealed system). Left: **1** ( $3.6 \times 10^{-3}$  M, 4 mol%); Right: *in situ* prepared  $[(\text{Rh}(\text{PPh}_2(\text{CH}_2)_3\text{PPh}_2))_2(\mu\text{-H})(\mu\text{-BH}_2\text{NMe}_2)][\text{BAr}^{\text{F}}_4]$  ( $1.8 \times 10^{-3}$  M, 2 mol%).

## 19. Reactivity of H<sub>3</sub>B·NMe<sub>2</sub>H with **1** in THF: Formation of $[(\text{Rh}(\text{PPh}_2(\text{CH}_2)_3\text{PPh}_2))_2(\mu\text{-H})(\mu\text{-BH}_2\text{NMe}_2)][\text{BAr}^{\text{F}}_4]$

1.2 equivalents of H<sub>3</sub>B·NMe<sub>2</sub>H was added to  $[\text{Rh}(\text{PPh}_2(\text{CH}_2)_3\text{PPh}_2)(\text{C}_6\text{H}_5\text{F})][\text{BAr}^{\text{F}}_4]$  in THF in a sealed NMR tube. NMR spectroscopy and ESI-MS after 2 minutes showed mixture of complexes, one of which was tentatively characterized as  $[(\text{Rh}(\text{PPh}_2(\text{CH}_2)_3\text{PPh}_2))_2(\mu\text{-H})(\mu\text{-BH}_2\text{NMe}_2)][\text{BAr}^{\text{F}}_4]$  (60% yield by <sup>31</sup>P{<sup>1</sup>H} NMR spectroscopy). <sup>1</sup>H NMR spectroscopy showed the signal at  $\delta -7.05$  (s) presumably due to the bound hydrides (BH<sub>2</sub> and RhH). <sup>31</sup>P{<sup>1</sup>H} NMR spectroscopy showed a doublet at  $\delta 23.5$  ( $J_{\text{RhP}} = 140$ ). Bound H<sub>2</sub>B=NMe<sub>2</sub> unit was observed at  $\delta 52.7$  in <sup>11</sup>B NMR spectrum. Signals corresponding to  $[\text{BH}_2(\text{NMe}_2)(\text{THF})][\text{BAr}^{\text{F}}_4]$  and  $[\text{BH}_2(\text{NMe}_2)_2][\text{BAr}^{\text{F}}_4]$  were also observed in <sup>11</sup>B NMR spectrum as broad triplets at  $\delta 4.8$  (t,  $J_{\text{BH}} = 110$ ) and  $\delta -2.8$  (t,  $J_{\text{BH}} = 113$ ).<sup>14</sup>

ESI-MS corresponding to  $[(\text{Rh}(\text{PPh}_2(\text{CH}_2)_3\text{PPh}_2))_2(\mu\text{-H})(\mu\text{-BH}_2\text{NMe}_2)][\text{BAr}^{\text{F}}_4]$ : m/z 1088.1990 [M<sup>+</sup>], calc. 1088.1958.

## 20. Initial rate studies in THF in a closed system

H<sub>3</sub>B·NH<sub>2</sub>R (R = Me and H) and **4** were mixed in a sealed NMR tube to which THF was added. Initial rates at different concentrations of H<sub>3</sub>B·NH<sub>2</sub>R or **4** were calculated from the pseudo zero-order region of the temporal consumption of H<sub>3</sub>B·NH<sub>2</sub>R as measured by <sup>11</sup>B NMR spectroscopy over the first 20 minutes of catalysis (~ 5% conversion of H<sub>3</sub>B·NH<sub>2</sub>R). Plot of initial rates against concentration of H<sub>3</sub>B·NH<sub>2</sub>R or **4** gives the order of the reaction.<sup>16</sup>

## Initial rate studies for $\text{H}_3\text{B}\cdot\text{NH}_3$

**Table S1** Initial rate data on altering the concentrations of  $\text{H}_3\text{B}\cdot\text{NH}_3$  and **4**.

| [Catalyst] ( $10^{-3}$ M) | $[\text{H}_3\text{B}\cdot\text{NH}_3]$ ( $10^{-2}$ M) | Initial rate ( $10^{-5}$ $\text{Ms}^{-1}$ ) |
|---------------------------|-------------------------------------------------------|---------------------------------------------|
| 1.7                       | 4.6                                                   | $2.2 \pm 0.21$                              |
| 1.7                       | 9.2                                                   | $3.7 \pm 0.62$                              |
| 1.7                       | 18.4                                                  | $8.0 \pm 0.13$                              |
| 0.85                      | 9.2                                                   | $2.0 \pm 0.24$                              |
| 3.4                       | 9.2                                                   | $8.3 \pm 0.41$                              |

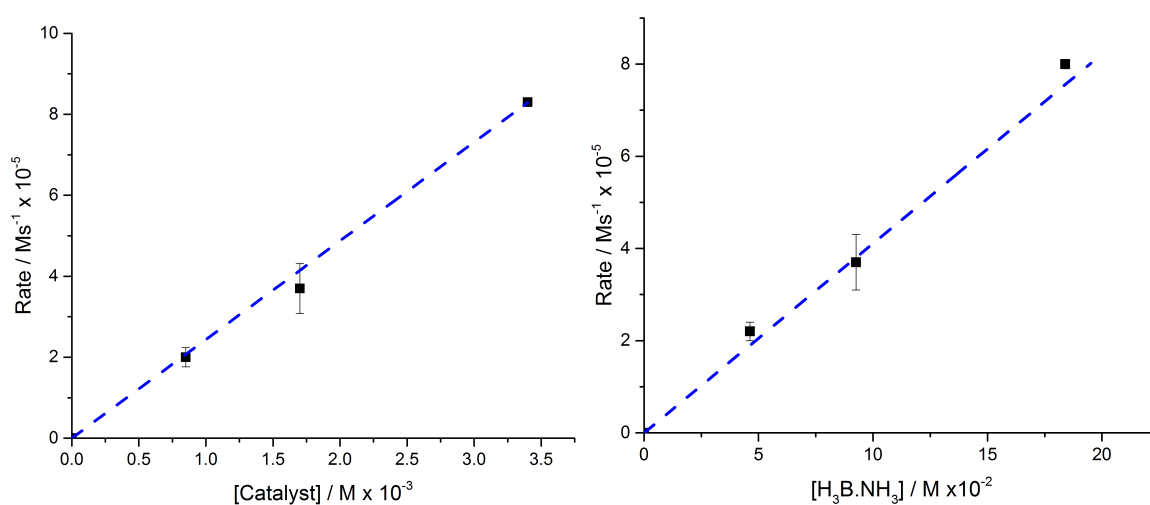

**Figure S19** Plot of initial rates against concentrations of **4** (left) and  $\text{H}_3\text{B}\cdot\text{NH}_3$ .

## Initial rate studies for $\text{H}_3\text{B}\cdot\text{NH}_2\text{Me}$

**Table S2** Initial rate data on altering the concentrations of  $\text{H}_3\text{B}\cdot\text{NH}_2\text{Me}$  and **4**.

| [Catalyst] ( $10^{-3}$ M) | $[\text{H}_3\text{B}\cdot\text{NH}_2\text{Me}]$ ( $10^{-2}$ M) | Initial rate ( $10^{-5}$ $\text{Ms}^{-1}$ ) |
|---------------------------|----------------------------------------------------------------|---------------------------------------------|
| 1.7                       | 4.5                                                            | $1.0 \pm 0.21$                              |
| 1.7                       | 9.0                                                            | $1.9 \pm 0.62$                              |
| 1.7                       | 18                                                             | $3.8 \pm 0.13$                              |
| 0.85                      | 9.0                                                            | $0.9 \pm 0.11$                              |
| 3.4                       | 9.0                                                            | $3.5 \pm 0.32$                              |

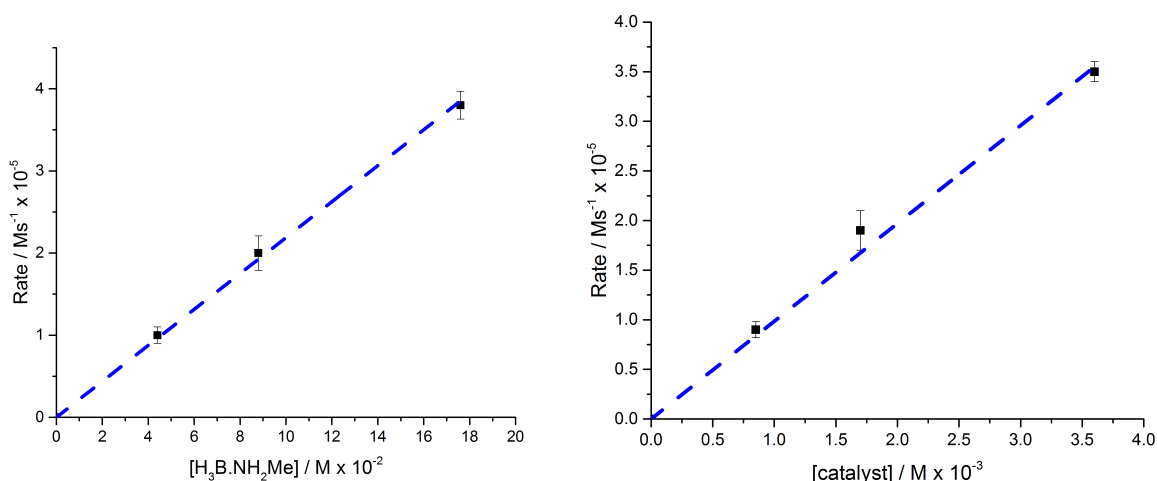

**Figure S20** Plot of initial rates against concentrations of **4** (left) and H<sub>3</sub>B·NH<sub>2</sub>Me.

## 21. X-ray crystallography details

X-ray crystallography data for **3** and **4** were collected on an Agilent SuperNova diffractometer using graphite monochromated Cu K $\alpha$  radiation ( $\lambda = 1.54180 \text{ \AA}$ ) and a low-temperature device [173(2) K];<sup>17</sup> data were collected using COLLECT, reduction and cell refinement was performed using DENZO/SCALEPACK.<sup>18</sup> X-ray crystallography data for **6** and **7** were collected on an Enraf Nonius Kappa CCD diffractometer using graphite monochromated Mo K $\alpha$  radiation ( $\lambda = 0.71073 \text{ \AA}$ ) and a low-temperature device [173(2) K];<sup>17</sup> data were collected using SuperNova, reduction and cell refinement was performed using CrysAlis.<sup>19</sup> The structures were solved by direct methods using Superflip<sup>20</sup> and refined full-matrix least squares on  $F^2$  using CRYSTALS.<sup>21</sup> All non-hydrogen atoms were refined with anisotropic displacement parameters. All hydrogen atoms were placed in calculated positions and refined before applying the riding model unless otherwise stated. Crystallographic data have been deposited with the Cambridge Crystallographic Data Centre under CCDC 1438000-1438003. These data can be obtained free of charge from The Cambridge Crystallographic Data Centre via [www.ccdc.cam.ac.uk/data\\_request/cif](http://www.ccdc.cam.ac.uk/data_request/cif). Full bond length and bond angle data may be found in the CIFs.

### Special refinement details:

#### Compound 3

Rotational disorder of the CF<sub>3</sub> groups of the anion was treated by modelling the fluorine atoms over two sites and restraining their geometry. One molecule of THF was located in the Fourier map. Due to disorder this solvent molecule could not be adequately modelled and so was treated using the SQUEEZE algorithm<sup>22</sup> leaving a void from which the electron density

was removed. Hydrogen atoms H24, H25, H29 and H30 were located on the Fourier map and allowed to refine freely before using the riding model. H15 was located on the Fourier map and allowed to refine freely without constraints. All other hydrogen atoms were placed in calculated positions and constrained using the riding model.

#### **Compound 4**

Rotational disorder of the CF<sub>3</sub> groups of the anion was treated by modelling the fluorine atoms over two sites and restraining their geometry. Hydrogen atoms H1, H2, H3 and H4 were located on the Fourier map and allowed to refine freely before using the riding model. H3 was located on the Fourier map and allowed to refine freely without constraints. All other hydrogen atoms were placed in calculated positions and constrained using the riding model. One isopropyl group showed large displacement ellipsoids and so was modelled over two sites, with restraints utilised to maintain a similar geometry in both disorder units. Similarly the back bone (C<sub>3</sub>H<sub>6</sub>) of one Dipp3 ligand was disordered over two sites (evident in Fourier map) and so was modelled over two sites and restrained so that both disorder units have similar geometry (but no symmetry was enforced). Shift limiting restraints were used to help convergence to a minimum at the end of refinement.

#### **Compound 6**

Rotational disorder of the CF<sub>3</sub> groups of the anion was treated by modelling the fluorine atoms over two sites and restraining their geometry.

#### **Compound 7**

Rotational disorder of the CF<sub>3</sub> groups of the anion was treated by modelling the fluorine atoms over two sites and restraining their geometry. BH<sub>3</sub>NMe<sub>3</sub> disorder was treated by modelling the BH<sub>3</sub>NMe<sub>3</sub> ligand over two sites and using similarity restraints to maintain sensible geometries. B–H hydrides were placed in calculated positions. All hydrogen atoms were refined freely before applying the riding model. Disorder of the phosphine backbone was modelled by splitting the central backbone carbon over two positions and refining the occupancy of the two positions. Hydrogen atoms were then placed at calculated positions referring to each disorder orientation. A small Q-peak of residual electron density was identified at the end of refinement nearby the rhodium atom, this could be due to a small trace of a twinned component or minor disorder.



**Table S3** Crystallographic data for **3**, **4**, **6** and **7**.

|                                                            |                                                                                                              |                                                                                                              |
|------------------------------------------------------------|--------------------------------------------------------------------------------------------------------------|--------------------------------------------------------------------------------------------------------------|
| Compound                                                   | <b>3</b>                                                                                                     | <b>4</b>                                                                                                     |
| CCDC No.                                                   | 1438000                                                                                                      | 1438001                                                                                                      |
| Formula                                                    | C <sub>86</sub> H <sub>69</sub> B <sub>2</sub> F <sub>24</sub> N <sub>1</sub> P <sub>4</sub> Rh <sub>2</sub> | C <sub>62</sub> H <sub>85</sub> B <sub>2</sub> F <sub>24</sub> N <sub>1</sub> P <sub>4</sub> Rh <sub>2</sub> |
| <i>M</i>                                                   | 1923.78                                                                                                      | 1651.64                                                                                                      |
| Crystal System                                             | triclinic                                                                                                    | monoclinic                                                                                                   |
| Space Group                                                | <i>P</i> -1                                                                                                  | <i>P</i> 2 <sub>1</sub> / <i>c</i>                                                                           |
| T [K]                                                      | 150                                                                                                          | 150                                                                                                          |
| <i>a</i> [Å]                                               | 12.9810(2)                                                                                                   | 18.5806(4)                                                                                                   |
| <i>b</i> [Å]                                               | 17.1942(3)                                                                                                   | 15.9539(3)                                                                                                   |
| <i>c</i> [Å]                                               | 21.5379(4)                                                                                                   | 25.1637(4)                                                                                                   |
| $\alpha$ [deg]                                             | 68.0529(17)                                                                                                  | 90                                                                                                           |
| $\beta$ [deg]                                              | 84.7135(15)                                                                                                  | 97.5683(19)                                                                                                  |
| $\gamma$ [deg]                                             | 83.5328(15)                                                                                                  | 90                                                                                                           |
| <i>V</i> [Å <sup>3</sup> ]                                 | 4423.92(14)                                                                                                  | 7394.37(13)                                                                                                  |
| <i>Z</i>                                                   | 2                                                                                                            | 4                                                                                                            |
| Radiation Type                                             | Cu K $\alpha$                                                                                                | Cu K $\alpha$                                                                                                |
| $\mu$ (mm <sup>-1</sup> )                                  | 4.526                                                                                                        | 5.299                                                                                                        |
| $\theta$ range [deg]                                       | 2.849 $\leq$ $\theta$ $\leq$ 76.410                                                                          | 3.288 $\leq$ $\theta$ $\leq$ 74.469                                                                          |
| Reflns collected                                           | 51685                                                                                                        | 31990                                                                                                        |
| <i>R</i> <sub>int</sub>                                    | 0.023                                                                                                        | 0.025                                                                                                        |
| No. of data/restr/param                                    | 18267 / 912 / 1180                                                                                           | 14608 / 2729 / 1045                                                                                          |
| <i>R</i> <sub>1</sub> [ <i>I</i> > 2 $\sigma$ ( <i>I</i> ) | 0.0432                                                                                                       | 0.0453                                                                                                       |
| <i>wR</i> <sub>2</sub> [all data]                          | 0.1118                                                                                                       | 0.1196                                                                                                       |
| <i>GoF</i>                                                 | 0.9781                                                                                                       | 0.9941                                                                                                       |
| Largest diff. pk and hole [e/Å <sup>3</sup> ]              | 1.94, -1.45                                                                                                  | 1.57, -1.10                                                                                                  |
| Compound                                                   | <b>6</b>                                                                                                     | <b>7</b>                                                                                                     |
| CCDC No.                                                   | 1438002                                                                                                      | 1438003                                                                                                      |
| Formula                                                    | C <sub>67</sub> H <sub>54</sub> O <sub>2</sub> P <sub>6</sub> Zn <sub>4</sub>                                | C <sub>50</sub> H <sub>58</sub> B <sub>1</sub> F <sub>24</sub> N <sub>1</sub> P <sub>2</sub> Rh <sub>1</sub> |
| <i>M</i>                                                   | 2125.23                                                                                                      | 1315.44                                                                                                      |
| Crystal System                                             | triclinic                                                                                                    | monoclinic                                                                                                   |
| Space Group                                                | <i>P</i> -1                                                                                                  | <i>P</i> 2 <sub>1</sub> / <i>c</i>                                                                           |
| T [K]                                                      | 150                                                                                                          | 150                                                                                                          |
| <i>a</i> [Å]                                               | 12.81750(10)                                                                                                 | 13.01020(10)                                                                                                 |
| <i>b</i> [Å]                                               | 14.3695(2)                                                                                                   | 18.4069(2)                                                                                                   |
| <i>c</i> [Å]                                               | 19.6829(3)                                                                                                   | 24.2512(2)                                                                                                   |
| $\alpha$ [deg]                                             | 71.2073(5)                                                                                                   | 90                                                                                                           |
| $\beta$ [deg]                                              | 76.2971(5)                                                                                                   | 92.6115(4)                                                                                                   |
| $\gamma$ [deg]                                             | 88.5829(6)                                                                                                   | 90                                                                                                           |
| <i>V</i> [Å <sup>3</sup> ]                                 | 3329.03(5)                                                                                                   | 5801.58(5)                                                                                                   |
| <i>Z</i>                                                   | 2                                                                                                            | 4                                                                                                            |
| Radiation Type                                             | Mo K $\alpha$                                                                                                | Mo K $\alpha$                                                                                                |
| $\mu$ (mm <sup>-1</sup> )                                  | 1.149                                                                                                        | 0.461                                                                                                        |
| $\theta$ range [deg]                                       | 5.133 $\leq$ $\theta$ $\leq$ 27.513                                                                          | 5.099 $\leq$ $\theta$ $\leq$ 27.485                                                                          |
| Reflns collected                                           | 61277                                                                                                        | 73207                                                                                                        |
| <i>R</i> <sub>int</sub>                                    | 0.024                                                                                                        | 0.022                                                                                                        |
| No. of data/restr/param                                    | 15170 / 852 / 985                                                                                            | 13193 / 684 / 833                                                                                            |
| <i>R</i> <sub>1</sub> [ <i>I</i> > 2 $\sigma$ ( <i>I</i> ) | 0.0454                                                                                                       | 0.0736                                                                                                       |

|                                                   |             |             |
|---------------------------------------------------|-------------|-------------|
| $wR_2$ [all data]                                 | 0.1154      | 0.1670      |
| $GoF$                                             | 0.9240      | 0.9672      |
| Largest diff. pk and hole<br>[ $e/\text{\AA}^3$ ] | 0.88, -0.65 | 2.52, -4.45 |

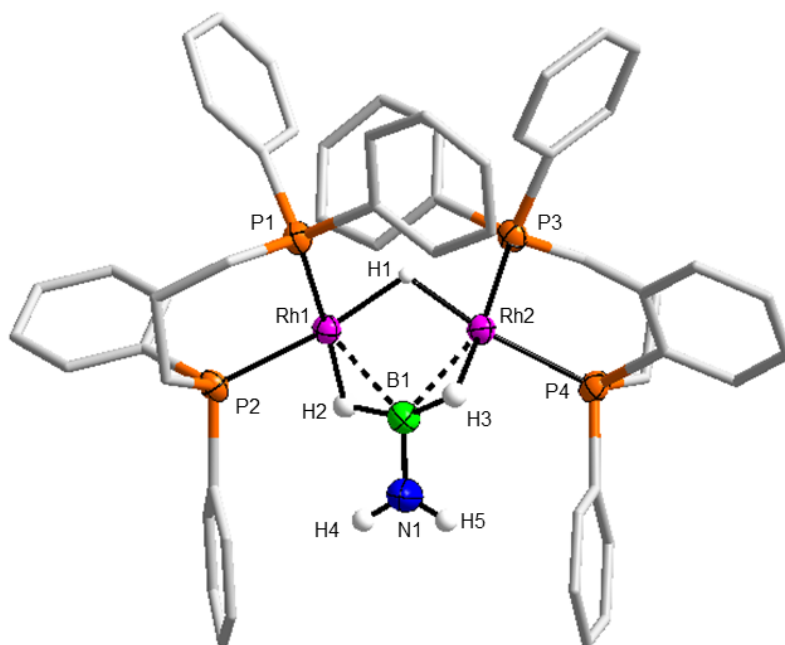

**Figure S21** Solid state structure of the cationic portion of **3** with displacement ellipsoids at the 50% probability level. For clarity carbon-bound H atoms are omitted, and the carbon atoms are depicted as a wireframe. Selected bond lengths ( $\text{\AA}$ ) and bond angles ( $^\circ$ ): Rh1-P1, 2.2928(8); Rh1-P2, 2.2464(8); Rh2-P3, 2.2961(8); Rh2-P4, 2.2544(8); Rh1-B1, 2.111(4); Rh2-B1, 2.077(4); Rh1-Rh2, 2.7905(3); B1-N1, 1.379(5); Rh1-B1-Rh2, 83.55(14).

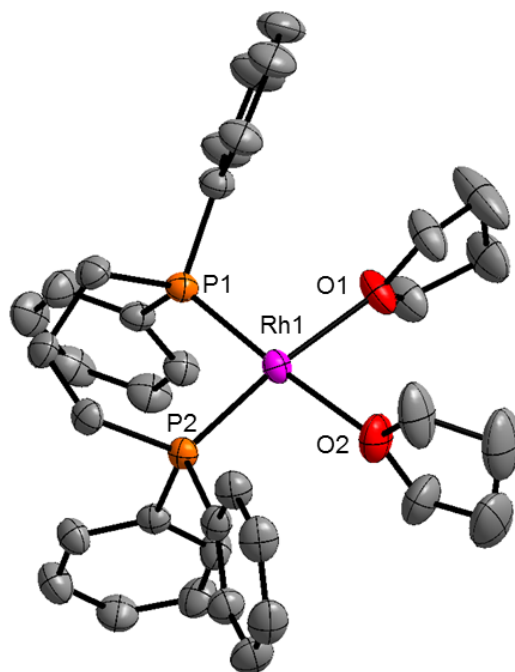

**Figure S22** Solid state structure of the cationic portion of **6** with displacement ellipsoids at the 50% probability level. For clarity carbon-bound H atoms are omitted. Selected bond lengths (Å): Rh1–P1, 2.1723(7); Rh1–P2, 2.1775(7); Rh1–O1, 2.181(2); Rh1–O2, 2.176(2), Selected bond angles (°) O1–Rh1–O2, 81.80 (9).

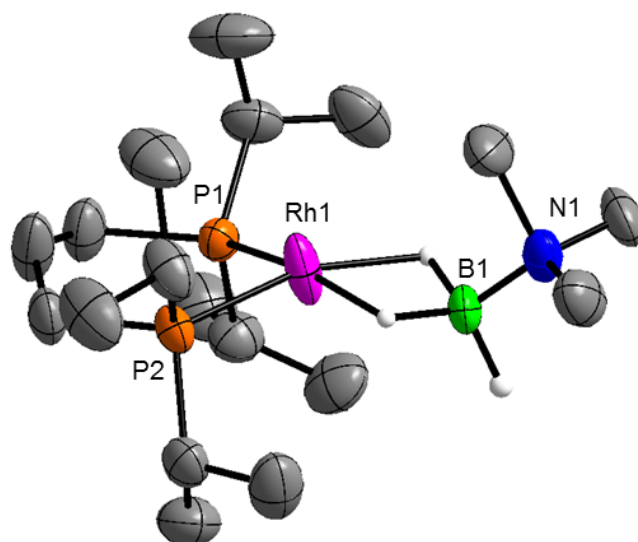

**Figure S23** Solid state structure of the cationic portion of **7** with displacement ellipsoids at the 50% probability level. For clarity carbon-bound H atoms are omitted, and only one disordered component is shown. Selected bond lengths (Å): Rh1–P1, 2.2085(11); Rh1–P2, 2.2013(10); Rh1–B1, 2.283(9); B1–N1, 1.535(5), Selected bond angle (°) P1–Rh1–P2, 93.56(4).

## 22. Computational details and references

Calculations were run with Gaussian 03 Revision D.01<sup>a</sup> with PCM solvent corrections run with Gaussian 09, Revision D.01.<sup>b</sup> Geometry optimisations were performed using the BP86 functional<sup>c</sup> with Rh and P centres described with the Stuttgart RECPs and associated basis sets<sup>d</sup> (with added d-orbital polarisation on P ( $\zeta = 0.387$ )<sup>e</sup> and 6-31G\*\* basis sets<sup>f</sup> for all other atoms (called BS1). All stationary points were fully characterized via analytical frequency calculations as either minima (all positive eigenvalues) or transition states (one negative eigenvalue) and IRC calculations and subsequent geometry optimizations were used to confirm the minima linked by the fluxionality transition states. Frequency calculations also provided a free energy in the gas-phase, computed at 298.15 K and 1 atm. Energies reported in the text are based on the gas-phase free energies and incorporate a correction for dispersion effects using Grimme's D3 parameter set<sup>g</sup> (i.e. BP86-D3) as well as solvation (PCM approach) in THF.

Atoms in Molecules<sup>h</sup> analyses were performed with the AIMALL program<sup>i</sup> and employed partially optimized structures based on the experimental heavy atom positions with fully optimized H atoms positions. NMR chemical shifts were calculated with the B3LYP functional<sup>j</sup> with Stuttgart RECPs and basis sets on Rh and P (with d-orbital polarisation on the latter, as above) and 6-311g+\*\*\* basis sets<sup>k</sup> on C, H, O, B and N (BS2) and were based on the BP86-optimised geometries. Computed chemical shifts are quoted relative to  $\text{BF}_3 \cdot \text{OEt}_2$ . All geometries are provided as sets of Cartesian coordinates as well as the separate file amino-borane.xyz readable by Chemcraft<sup>l</sup> and Mercury.<sup>m</sup> Pipek-Mezey localised orbitals were computed with ORCA Version 3.0.3<sup>n</sup> using def2-TZVP basis sets<sup>o</sup> on the atoms of the  $\{\text{Rh}(\mu\text{-H})(\mu\text{-amino-borane})\text{Rh}\}$  unit with a [SD(28,MHF)] ECP for Rh<sup>p</sup> and def2-SV(P) on other atoms.<sup>q</sup>

### References

- a. Gaussian 03, Revision D.01, M. J. Frisch, G. W. Trucks, H. B. Schlegel, G. E. Scuseria, M. A. Robb, J. R. Cheeseman, J. A. Montgomery, Jr., T. Vreven, K. N. Kudin, J. C. Burant, J. M. Millam, S. S. Iyengar, J. Tomasi, V. Barone, B. Mennucci, M. Cossi, G. Scalmani, N. Rega, G. A. Petersson, H. Nakatsuji, M. Hada, M. Ehara, K. Toyota, R. Fukuda, J. Hasegawa, M. Ishida, T. Nakajima, Y. Honda, O. Kitao, H. Nakai, M. Klene, X. Li, J. E. Knox, H. P. Hratchian, J. B. Cross, C. Adamo, J. Jaramillo, R. Gomperts, R. E. Stratmann, O. Yazyev, A. J. Austin, R. Cammi, C. Pomelli, J. W. Ochterski, P. Y. Ayala, K. Morokuma, G. A. Voth, P. Salvador, J. J. Dannenberg, V. G. Zakrzewski, S. Dapprich, A. D. Daniels, M. C. Strain, O. Farkas, D. K. Malick, A. D. Rabuck, K. Raghavachari, J. B. Foresman, J. V. Ortiz, Q. Cui, A. G. Baboul, S. Clifford, J. Cioslowski, B. B. Stefanov, G. Liu, A. Liashenko, P. Piskorz, I. Komaromi, R. L. Martin, D. J. Fox, T. Keith, M. A. Al-Laham, C. Y. Peng, A. Nanayakkara, M. Challacombe, P. M. W. Gill, B. Johnson, W. Chen, M. W. Wong, C. Gonzalez, and J. A. Pople, Gaussian, Inc., Wallingford CT, 2004.
- b. Gaussian 09, Revision D.01, M. J. Frisch, G. W. Trucks, H. B. Schlegel, G. E. Scuseria, M. A. Robb, J. R. Cheeseman, G. Scalmani, V. Barone, B. Mennucci, G. A. Petersson, H. Nakatsuji, M. Caricato, X. Li, H. P. Hratchian, A. F. Izmaylov, J. Bloino, G. Zheng, J. L. Sonnenberg, M. Hada, M. Ehara, K. Toyota, R. Fukuda, J. Hasegawa, M. Ishida, T. Nakajima, Y. Honda, O. Kitao, H. Nakai, T. Vreven, J. A. Montgomery, Jr., J. E. Peralta, F. Ogliaro, M. Bearpark, J. J. Heyd, E. Brothers, K. N. Kudin, V. N. Staroverov, R. Kobayashi, J. Normand, K. Raghavachari, A. Rendell, J. C. Burant, S. S. Iyengar, J. Tomasi, M. Cossi, N. Rega, J. M. Millam, M. Klene, J. E. Knox, J. B. Cross, V. Bakken, C. Adamo, J. Jaramillo, R. Gomperts, R. E. Stratmann, O. Yazyev, A. J. Austin, R. Cammi, C. Pomelli, J. W. Ochterski, R. L. Martin, K. Morokuma, V. G. Zakrzewski, G. A. Voth, P. Salvador, J. J. Dannenberg, S. Dapprich, A. D. Daniels, Ö. Farkas, J. B. Foresman, J. V. Ortiz, J. Cioslowski, and D. J. Fox, Gaussian, Inc., Wallingford CT, 2009.

- c. (i) A. D. Becke, *Phys. Rev. A* **1988**, *38*, 3098. (ii) J. P. Perdew, *Phys. Rev. B* **1986**, *33*, 8822.
- d. D. Andrae, U. Häußermann, M. Dolg, H. Stoll and H. Preuß, *Theor. Chim. Acta* **1990**, *77*, 123.
- e. A. Hollwarth, M. Bohme, S. Dapprich, A. W. Ehlers, A. Gobbi, V. Jonas, K. F. Kohler, R. Stegmann, A. Veldkamp and G. Frenking, *Chem. Phys. Lett.* **1993**, *208*, 237.
- f. (i) W. J. Hehre, R. Ditchfield and J. A. Pople, *J. Chem. Phys.* **1972**, *56*, 2257. (ii) P. C. Hariharan and J. A. Pople, *Theor. Chim. Acta.* **1973**, *28*, 213.
- g. S. Grimme, J. Antony, S. Ehrlich and H. Krieg, *J. Chem. Phys.* **2010**, *132*, 154104.
- h. *Atoms in Molecules - A Quantum Theory* R.F.W. Bader, Oxford University Press, Oxford, **1990**.
- i. AIMAll (Version 13.02.26, Professional), Keith, T. A.; Gristmill, T. K. Software, Overland Park KS, USA, 2015 (aim.tkgristmill.com).
- i. (i) A. D. Becke, *J. Chem. Phys.*, **1993**, *98*, 5648-52; (ii) C. Lee, W. Yang, and R. G. Parr, *Phys. Rev. B*, **1988**, *37*, 785; (iii) S. H. Vosko, L. Wilk, and M. Nusair, *Can. J. Phys.*, **1980**, *58*, 1200-11.
- k. A. D. McLean and G. S. Chandler, *J. Chem. Phys.*, **1980**, *72*, 5639.
- l Chemcraft version 1.7 see <http://www.chemcraftprog.com>
- m. Mercury CSD 2.0 C. F. Macrae, I. J. Bruno, J. A. Chisholm, P. R. Edgington, P. McCabe, E. Pidcock, L. Rodriguez-Monge, R. Taylor, J. van de Streek and P. A. Wood, *J. Appl. Cryst.*, *41*, 466-470, 2008
- n. Frank Neese, *Wiley Interdisciplinary Reviews: Computational Molecular Science* **2012**, *2*, 73.
- o. F. Weigend, R. Ahlrichs, *Phys. Chem. Chem. Phys.* 2005, *7*, 3297.
- p. Dirk Andrae, Diplomarbeit (1989) (unpublished). Your calculation utilizes the basis: Ahlrichs-VDZ
- q. A. Schaefer, H. Horn and R. Ahlrichs, *J. Chem. Phys.* **1992**, *97*, 2571; (ii) A. Schaefer, C. Huber and R. Ahlrichs, *J. Chem. Phys.* **1994**, *100*, 5829.

## 23. QTAIM results

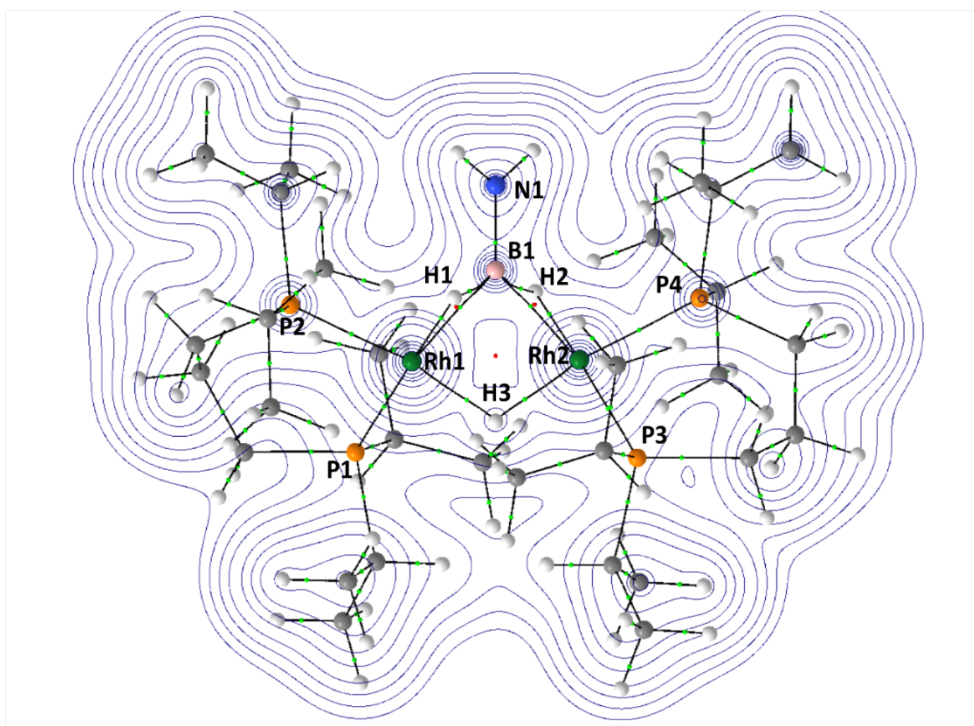

**Figure S24** Contour plots of the electron density of **4** presented in the {Rh1H1Rh2} plane with projected stationary points and bond paths. Bond critical points (BCP) are shown in green and ring critical points (RCP) in red. Weak bond paths and chemically less-relevant RCPs are omitted for clarity.

**Table S4** Comparison of key bond distances (Å) between the experimental and computed structures of **4**.

|                    | Experiment | Computed |
|--------------------|------------|----------|
| <b>B1 – Rh1</b>    | 2.070(5)   | 2.076    |
| <b>B1 – Rh2</b>    | 2.055(5)   | 2.075    |
| <b>B1 – H1</b>     | 1.358      | 1.476    |
| <b>B1 – H2</b>     | 1.485      | 1.478    |
| <b>H1 – Rh1</b>    | 1.717      | 1.660    |
| <b>H2 – Rh2</b>    | 1.724      | 1.662    |
| <b>H3 – Rh1</b>    | 1.663      | 1.750    |
| <b>H3 – Rh2</b>    | 1.737      | 1.749    |
| <b>P1 – Rh1</b>    | 2.2550(10) | 2.329    |
| <b>P2 – Rh1</b>    | 2.3063(10) | 2.358    |
| <b>B1 – N1</b>     | 1.377(6)   | 1.422    |
| <b>Rh1 ... Rh2</b> | 2.787(4)   | 2.847    |

**Table S5** Calculated QTAIM parameters (a.u.) for selected BCPs in **4**. ( $\rho(r)$  = electron density,  $\nabla^2 \rho(r)$  = Laplacian of electron density,  $\epsilon$  = bond ellipticity,  $H(r)$  = local energy density,  $V(r)$  = potential energy density,  $G(r)$  = kinetic energy density).

|                 | $\rho(r)$ | $\nabla^2 \rho(r)$ | $\epsilon$ | $H(r)$ | $V(r)$ | $G(r)$ |
|-----------------|-----------|--------------------|------------|--------|--------|--------|
| <b>B1 – Rh1</b> | 0.11      | 0.02               | 0.39       | -0.05  | -0.11  | 0.06   |
| <b>B1 – Rh2</b> | 0.11      | 0.03               | 0.54       | -0.05  | -0.11  | 0.06   |
| <b>B1 – H1</b>  | 0.11      | -0.14              | 0.36       | -0.07  | -0.10  | 0.03   |
| <b>B1 – H2</b>  | 0.11      | -0.13              | 0.37       | -0.07  | -0.10  | 0.03   |
| <b>Rh1 – H1</b> | 0.11      | 0.25               | 0.52       | -0.04  | -0.14  | 0.10   |
| <b>Rh2 – H2</b> | 0.11      | 0.26               | 0.52       | -0.04  | -0.15  | 0.11   |
| <b>Rh1 – H3</b> | 0.09      | 0.16               | 0.12       | -0.03  | -0.10  | 0.07   |
| <b>Rh2 – H3</b> | 0.09      | 0.16               | 0.11       | -0.03  | -0.10  | 0.07   |
| <b>B1 – N1</b>  | 0.20      | 0.69               | 0.14       | -0.16  | -0.49  | 0.33   |

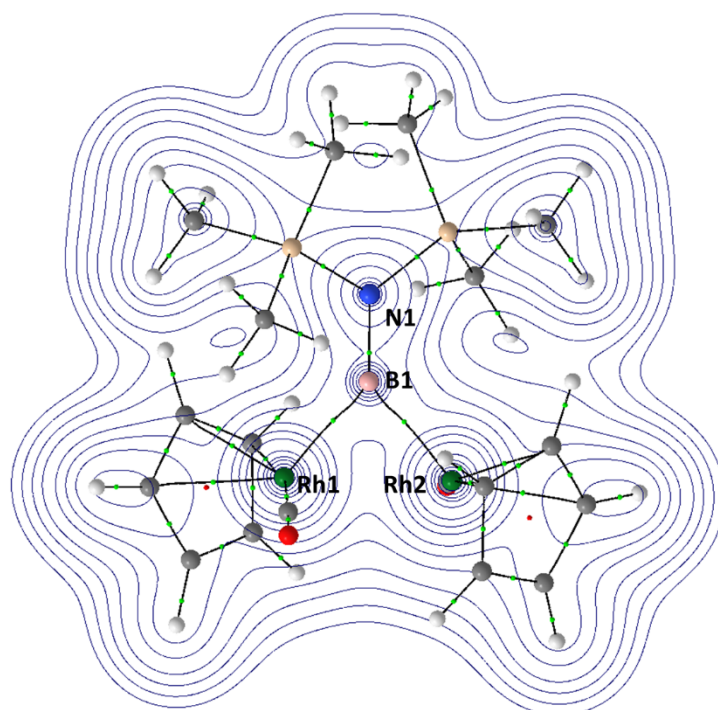

**Figure S25** Contour plots of the electron density of **C** presented in the {Rh1H1Rh2} plane with projected stationary points and bond paths. Bond critical points (BCP) are shown in green and ring critical points (RCP) in red. Weak bond paths and chemically less-relevant non-important RCPs are omitted for clarity.

**Table S6** Comparison of key bond distances (Å) between the experimental and computed structures of **C**.

|                    | Experiment | Computed |
|--------------------|------------|----------|
| <b>B1 – Rh1</b>    | 2.054(2)   | 2.079    |
| <b>B1 – Rh2</b>    | 2.054(2)   | 2.079    |
| <b>B1 – N1</b>     | 1.399(3)   | 1.410    |
| <b>Rh1 ... Rh2</b> | 2.668(3)   | 2.686    |

**Table S7** Calculated QTAIM parameters (a.u) for selected BCPs in **C**. ( $\rho(r)$  = electron density,  $\nabla^2 \rho(r)$  = Laplacian of electron density,  $\epsilon$  = bond ellipticity,  $H(r)$  = local energy density,  $V(r)$  = potential energy density,  $G(r)$  = kinetic energy density).

|                 | $\rho(r)$ | $\nabla^2 \rho(r)$ | $\epsilon$ | $H(r)$ | $V(r)$ | $G(r)$ |
|-----------------|-----------|--------------------|------------|--------|--------|--------|
| <b>B1 – Rh1</b> | 0.11      | -0.03              | 0.08       | -0.06  | -0.11  | 0.05   |
| <b>B1 – Rh2</b> | 0.11      | -0.03              | 0.08       | -0.06  | -0.11  | 0.05   |
| <b>B1 – N1</b>  | 0.21      | 0.64               | 0.10       | -0.17  | -0.50  | 0.33   |



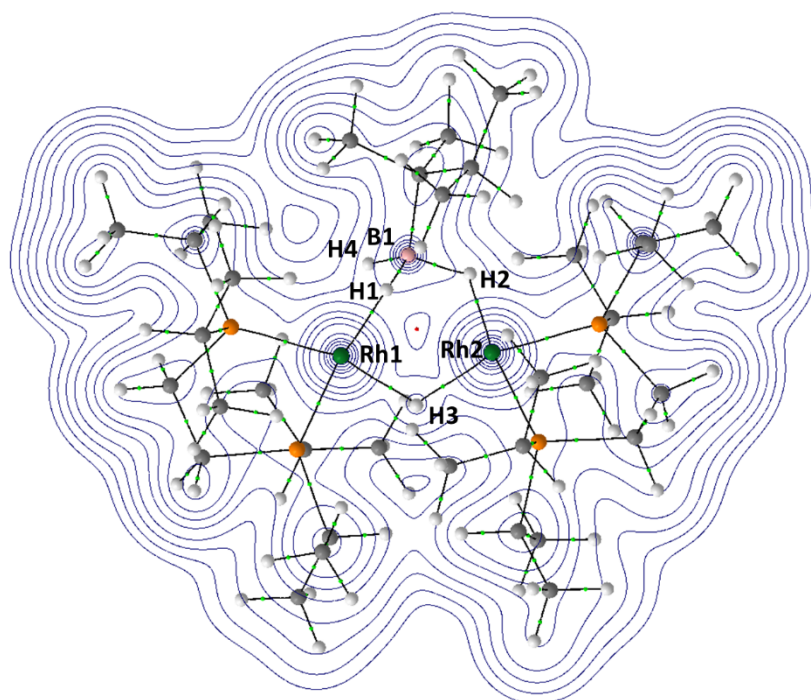

**Figure S26** Contour plots of the electron density of **D** presented in the {Rh1H1Rh2} plane with projected stationary points and bond paths. Bond critical points (BCP) are shown in green and ring critical points (RCP) in red. Weak bond paths and chemically less-relevant RCPs are omitted for clarity.

**Table S8** Comparison of key bond distances (Å) between the experimental and computed structures of **D**.

|                  | Experiment | Computed |
|------------------|------------|----------|
| <b>B1 – H1</b>   | 1.262(25)  | 1.337    |
| <b>B1 – H2</b>   | 1.230(27)  | 1.321    |
| <b>H1 – Rh1</b>  | 1.739(24)  | 1.803    |
| <b>H2 – Rh2</b>  | 1.787(26)  | 1.708    |
| <b>H3 – Rh1</b>  | 1.722(26)  | 1.741    |
| <b>H3 – Rh2</b>  | 1.755(25)  | 1.771    |
| <b>B1 – H4</b>   | 1.175(23)  | 1.248    |
| <b>Rh1 – P</b>   | 2.2154(7)  | 2.259    |
| <b>Rh1 – P</b>   | 2.2108(8)  | 2.290    |
| <b>Rh2 – P</b>   | 2.2380(7)  | 2.272    |
| <b>Rh2 – P</b>   | 2.2026(7)  | 2.267    |
| <b>Rh1 – Rh2</b> | 2.9120(6)  | 2.936    |

**Table S9** Calculated QTAIM parameters (a.u.) for selected BCPs in **D**. ( $\rho(r)$  = electron density,  $\nabla^2 \rho(r)$  = Laplacian of electron density,  $\epsilon$  = bond ellipticity,  $H(r)$  = local energy density,  $V(r)$  = potential energy density,  $G(r)$  = kinetic energy density).

|                     | $\rho(r)$ | $\nabla^2 \rho(r)$ | $\epsilon$ | $H(r)$ | $V(r)$ | $G(r)$ |
|---------------------|-----------|--------------------|------------|--------|--------|--------|
| <b>B1 – Rh1/Rh2</b> | -         | -                  | -          | -      | -      | -      |
| <b>B1 – H1</b>      | 0.13      | -0.10              | 0.23       | -0.11  | -0.21  | 0.09   |
| <b>B1 – H2</b>      | 0.12      | -0.07              | 0.10       | -0.10  | -0.20  | 0.09   |
| <b>B1 – H4</b>      | 0.15      | -0.20              | 0.11       | -0.15  | -0.27  | 0.11   |
| <b>Rh1 – H1</b>     | 0.09      | 0.24               | 0.24       | -0.03  | -0.12  | 0.09   |
| <b>Rh2 – H2</b>     | 0.08      | 0.22               | 0.50       | -0.03  | -0.10  | 0.07   |
| <b>Rh1 – H3</b>     | 0.08      | 0.15               | 0.12       | -0.02  | -0.09  | 0.07   |
| <b>Rh2 – H3</b>     | 0.09      | 0.16               | 0.10       | -0.03  | -0.10  | 0.07   |

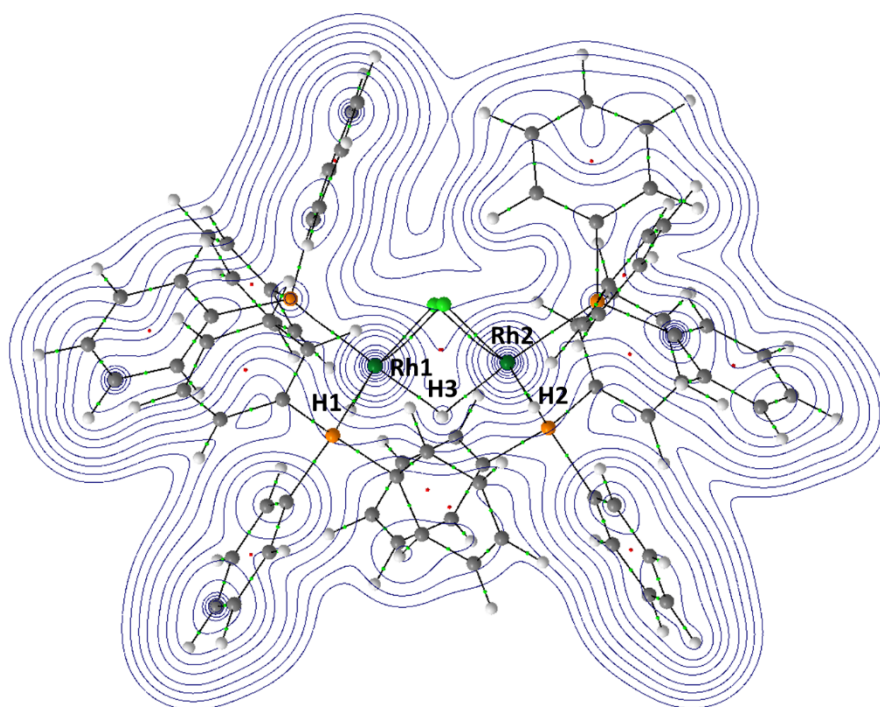

**Figure S27** Contour plots of the electron density of **E** presented in the {Rh1H1Rh2} plane with projected stationary points and bond paths. Bond critical points (BCP) are shown in green and ring critical points (RCP) in red. Weak bond paths and chemically less-relevant RCPs are omitted for clarity.

**Table S10** Comparison of key bond distances (Å) between the experimental and computed structures of **E**.

|             | Experiment | Computed |
|-------------|------------|----------|
| H1 – Rh1    | 1.59(7)    | 1.537    |
| H2 – Rh2    | 1.60(9)    | 1.539    |
| H3 – Rh1    | 1.82(6)    | 1.762    |
| H3 – Rh2    | 1.82(6)    | 1.765    |
| Rh1 – Cl    | 2.416(3)   | 2.469    |
| Rh1 – Cl    | 2.553(3)   | 2.567    |
| Rh2 – Cl    | 2.394(2)   | 2.459    |
| Rh2 – Cl    | 2.538(3)   | 2.600    |
| Rh1 – P     | 2.257(3)   | 2.305    |
| Rh 1 – P    | 2.313(3)   | 2.366    |
| Rh2 – P     | 2.256(3)   | 2.309    |
| Rh2 – P     | 2.301(3)   | 2.378    |
| Rh1 ... Rh2 | 2.7758(11) | 2.808    |

**Table S11** Calculated QTAIM parameters (a.u.) for selected BCPs in **E**. ( $\rho(r)$  = electron density,  $\nabla^2 \rho(r)$  = Laplacian of electron density,  $\varepsilon$  = bond ellipticity,  $H(r)$  = local energy density,  $V(r)$  = potential energy density,  $G(r)$  = kinetic energy density).

|                 | $\rho(r)$ | $\nabla^2 \rho(r)$ | $\varepsilon$ | $H(r)$ | $V(r)$ | $G(r)$ |
|-----------------|-----------|--------------------|---------------|--------|--------|--------|
| <b>Rh1 – H1</b> | 0.16      | 0.06               | 0.01          | -0.10  | -0.20  | 0.10   |
| <b>Rh2 – H2</b> | 0.16      | 0.06               | 0.01          | -0.09  | -0.19  | 0.10   |
| <b>Rh1 – H3</b> | 0.09      | 0.16               | 0.12          | -0.03  | -0.10  | 0.07   |
| <b>Rh2 – H3</b> | 0.09      | 0.16               | 0.11          | -0.03  | -0.10  | 0.07   |

## 24. Calculated $^{11}\text{B}$ NMR shifts

**Table S12** Calculated  $^{11}\text{B}$  NMR shifts (ppm, B3LYP(BS2)//BP86(BS1)).

| Complex  | $^{11}\text{B}$ shift |
|----------|-----------------------|
| <b>4</b> | 51.04                 |
| <b>C</b> | 97.53                 |

## 25. Pipek-Mezey localised orbitals

(a)

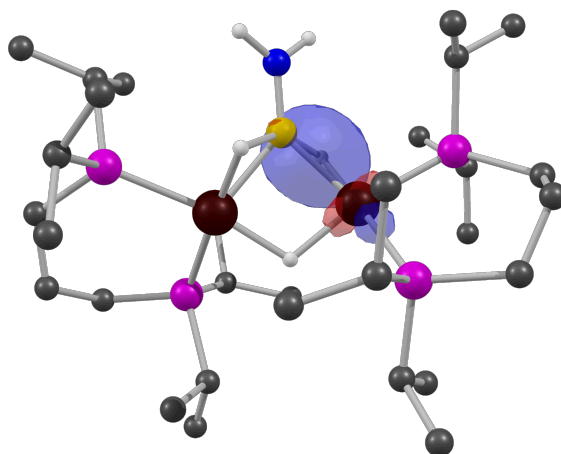

(b)

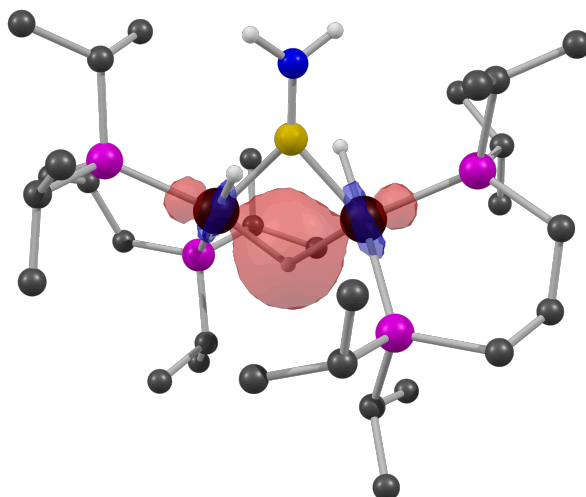

**Figure S28** Pipek-Mezey localised orbitals for (a) the {Rh2-H2-B1} interaction (cf. {Rh1-H1-B1} interaction shown in **Figure 3**); (b) the {Rh1-H3-Rh2} interaction.

**26. Cartesian coordinates (Å) and computed energies (in hartrees) for all optimised structures. All structures can be visualized via the amino-borane.xyz file provided.**

4  
 SCF Energy = -1514.46765082  
 Enthalpy 0K = -1513.503193  
 Enthalpy 298K = -1513.443864  
 Free Energy 298K = -1513.592384  
 SCF(THF) = -1514.50380934  
 SCF(BP86-D3) = -0.21807101  
 Lowest Frequencies = 23.2682  
 26.9424 cm<sup>-1</sup>

|   |          |          |          |
|---|----------|----------|----------|
| B | 0.01925  | -1.67196 | 0.03586  |
| C | -4.13365 | 1.39013  | 1.72672  |
| C | -5.00426 | 1.03774  | 0.50357  |
| C | -5.03774 | -0.46483 | 0.16912  |
| C | 4.07331  | 1.45389  | -1.81697 |
| C | 4.82132  | 0.11141  | -1.70802 |
| C | 5.02330  | -0.38401 | -0.26275 |
| C | -1.58364 | 1.24017  | 3.16225  |
| C | -0.11569 | 1.68916  | 3.24947  |
| C | -1.74984 | -0.20558 | 3.66189  |
| C | -1.92009 | 3.22101  | 0.93166  |
| C | -2.37280 | 4.26574  | 1.96614  |
| C | -2.46734 | 3.54256  | -0.47191 |
| C | -3.61918 | -3.03648 | -0.03143 |
| C | -3.32446 | -3.20244 | 1.46932  |
| C | -4.95450 | -3.69234 | -0.42946 |
| C | -3.89080 | -1.26545 | -2.41273 |
| C | -3.98707 | 0.15415  | -2.99993 |
| C | -2.90400 | -2.13411 | -3.21053 |
| C | 4.02394  | -0.91895 | 2.42825  |
| C | 3.99514  | 0.55476  | 2.87191  |
| C | 3.15192  | -1.78290 | 3.35630  |
| C | 3.65878  | -2.96631 | 0.28276  |
| C | 3.39804  | -3.29187 | -1.19962 |
| C | 4.96746  | -3.60770 | 0.77834  |
| C | 1.44864  | 1.26122  | -3.13831 |
| C | -0.04011 | 1.63718  | -3.13917 |
| C | 1.67308  | -0.15544 | -3.69542 |
| C | 1.90782  | 3.24152  | -0.92962 |
| C | 2.48832  | 3.53066  | 0.46709  |
| C | 2.37760  | 4.27226  | -1.97136 |
| H | -4.41446 | 2.37968  | 2.12667  |
| H | -4.31335 | 0.66061  | 2.53706  |
| H | -0.63673 | -3.66066 | -0.46946 |
| H | 0.71466  | -3.64240 | 0.56321  |
| H | -4.67834 | 1.61752  | -0.37833 |
| H | -6.04123 | 1.36118  | 0.71221  |

|   |          |          |          |
|---|----------|----------|----------|
| H | -5.84852 | -0.67154 | -0.55166 |
| H | -5.27803 | -1.03508 | 1.08502  |
| H | 4.17483  | 1.86023  | -2.83884 |
| H | 4.54377  | 2.18747  | -1.13681 |
| H | 4.31747  | -0.66231 | -2.31326 |
| H | 5.82056  | 0.24579  | -2.16350 |
| H | 5.39659  | 0.44664  | 0.36334  |
| H | 5.80203  | -1.16561 | -0.23735 |
| H | -2.21080 | 1.91308  | 3.77971  |
| H | 0.26565  | 1.51361  | 4.27107  |
| H | 0.51191  | 1.10981  | 2.54364  |
| H | 0.01631  | 2.76116  | 3.02787  |
| H | -1.14439 | -0.89391 | 3.04829  |
| H | -1.41368 | -0.28271 | 4.71102  |
| H | -2.79638 | -0.55105 | 3.62385  |
| H | -0.81476 | 3.22179  | 0.87896  |
| H | -3.47276 | 4.32314  | 2.03670  |
| H | -1.97628 | 4.07007  | 2.97563  |
| H | -2.02190 | 5.26800  | 1.66218  |
| H | -2.09364 | 4.52518  | -0.81145 |
| H | -3.56944 | 3.60225  | -0.47145 |
| H | -2.16389 | 2.78362  | -1.21302 |
| H | -2.80469 | -3.52812 | -0.59746 |
| H | -3.32773 | -4.27370 | 1.73832  |
| H | -2.34331 | -2.77796 | 1.73380  |
| H | -4.09516 | -2.71381 | 2.09137  |
| H | -5.14602 | -3.65139 | -1.51409 |
| H | -5.80904 | -3.22319 | 0.08689  |
| H | -4.94634 | -4.75741 | -0.13713 |
| H | -4.89425 | -1.73040 | -2.45787 |
| H | -4.26545 | 0.10186  | -4.06761 |
| H | -3.01911 | 0.67922  | -2.92822 |
| H | -4.74968 | 0.76792  | -2.49234 |
| H | -1.87689 | -1.73663 | -3.13753 |
| H | -3.18769 | -2.13897 | -4.27789 |
| H | -2.89312 | -3.18372 | -2.87146 |
| H | 5.06825  | -1.28418 | 2.46477  |
| H | 4.36626  | 0.64278  | 3.90847  |
| H | 2.96526  | 0.95066  | 2.84573  |
| H | 4.62534  | 1.20572  | 2.24317  |
| H | 3.48260  | -1.66042 | 4.40278  |
| H | 2.09402  | -1.47277 | 3.30051  |
| H | 3.20825  | -2.85804 | 3.11896  |
| H | 2.82422  | -3.37767 | 0.88325  |
| H | 3.34285  | -4.38573 | -1.34293 |
| H | 2.45361  | -2.84692 | -1.55222 |
| H | 4.21987  | -2.92539 | -1.83888 |
| H | 5.14366  | -3.45363 | 1.85477  |
| H | 5.84721  | -3.22946 | 0.22973  |
| H | 4.93148  | -4.69786 | 0.60454  |
| H | 2.00495  | 1.98687  | -3.76336 |
| H | -0.46095 | 1.48318  | -4.14888 |
| H | -0.60838 | 1.00394  | -2.42738 |
| H | -0.20715 | 2.69307  | -2.86917 |
| H | 1.21333  | -0.90861 | -3.03294 |
| H | 1.21482  | -0.24393 | -4.69634 |

|    |          |          |          |   |          |          |          |
|----|----------|----------|----------|---|----------|----------|----------|
| H  | 2.74277  | -0.39954 | -3.80037 | C | 2.06238  | 3.54145  | 0.56435  |
| H  | 0.80421  | 3.27603  | -0.85566 | C | 2.22932  | 4.28461  | -1.86292 |
| H  | 2.19069  | 4.54002  | 0.80281  | H | -5.24777 | 1.98359  | 0.49723  |
| H  | 2.13484  | 2.79891  | 1.21323  | H | -5.19689 | 0.38807  | 1.25965  |
| H  | 3.59255  | 3.50729  | 0.46480  | H | -1.42993 | -1.55029 | 2.96721  |
| H  | 3.47478  | 4.26341  | -2.08875 | H | 0.16981  | -2.12348 | 3.11117  |
| H  | 2.09605  | 5.28975  | -1.64678 | H | -4.27001 | 0.83653  | -1.65599 |
| H  | 1.92728  | 4.10775  | -2.96409 | H | -5.94494 | 0.50026  | -1.21245 |
| H  | -0.00817 | 0.85534  | 0.01893  | H | -5.08155 | -1.63623 | -1.81025 |
| H  | -0.74762 | -1.28054 | -1.16246 | H | -5.14019 | -1.64789 | -0.04008 |
| H  | 0.79638  | -1.24964 | 1.21959  | H | 4.31844  | 2.11015  | -2.50644 |
| N  | 0.03038  | -3.09340 | 0.04825  | H | 4.46420  | 2.36390  | -0.75551 |
| P  | 3.50113  | -1.08876 | 0.60171  | H | 4.57182  | -0.44866 | -2.03987 |
| P  | 2.23139  | 1.42788  | -1.40944 | H | 5.99348  | 0.56507  | -1.77675 |
| P  | -2.28079 | 1.40892  | 1.39954  | H | 5.48143  | 0.67678  | 0.69164  |
| P  | -3.45647 | -1.20706 | -0.55552 | H | 5.86711  | -0.95012 | 0.10793  |
| Rh | 1.42063  | -0.14500 | 0.14618  | H | -3.91315 | 2.36027  | 2.98563  |
| Rh | -1.41416 | -0.17770 | -0.11557 | H | -1.97389 | 2.29195  | 4.60959  |

TS(4-4')

SCF Energy = -1514.45536401  
 Enthalpy 0K = -1513.490911  
 Enthalpy 298K = -1513.433261  
 Free Energy 298K = -1513.576420  
 SCF(THF) = -1514.49211422  
 SCF(BP86-D3) = -0.21234476  
 Lowest Frequencies = -46.9194  
 21.6696 cm<sup>-1</sup>

|   |          |          |          |   |          |          |          |
|---|----------|----------|----------|---|----------|----------|----------|
| B | -0.17759 | -1.01049 | 1.30881  | H | -1.49184 | 3.05302  | 3.07385  |
| C | -4.71802 | 1.01330  | 0.48397  | H | -2.87637 | -0.46575 | 3.65519  |
| C | -4.89680 | 0.33592  | -0.89429 | H | -3.84208 | 0.58918  | 4.70519  |
| C | -4.63417 | -1.18404 | -0.90596 | H | -4.56643 | -0.08238 | 3.22593  |
| C | 4.13905  | 1.63715  | -1.52400 | H | -1.58206 | 3.30519  | 0.75708  |
| C | 4.97633  | 0.35147  | -1.39392 | H | -4.60184 | 4.03074  | 0.78907  |
| C | 5.11062  | -0.14711 | 0.05386  | H | -3.44149 | 4.28422  | 2.12517  |
| C | -3.13124 | 1.58044  | 2.90562  | H | -3.26979 | 5.18853  | 0.60531  |
| C | -1.82561 | 2.10542  | 3.52972  | H | -2.30385 | 4.16728  | -1.46497 |
| C | -3.63652 | 0.33376  | 3.64930  | H | -3.66369 | 3.02290  | -1.51134 |
| C | -2.62214 | 3.12181  | 0.42679  | H | -1.98044 | 2.41305  | -1.56053 |
| C | -3.53673 | 4.20231  | 1.02936  | H | -1.78384 | -3.56443 | 0.26569  |
| C | -2.64472 | 3.17568  | -1.11264 | H | -3.23831 | -3.97400 | 2.16415  |
| C | -2.85551 | -3.33781 | 0.11045  | H | -3.20726 | -2.19579 | 1.96756  |
| C | -3.51221 | -3.14135 | 1.49087  | H | -4.61456 | -3.13763 | 1.41512  |
| C | -3.52492 | -4.51053 | -0.63000 | H | -2.99561 | -4.79865 | -1.55287 |
| C | -2.54726 | -2.25509 | -2.66096 | H | -4.57427 | -4.28086 | -0.89081 |
| C | -2.75022 | -1.08716 | -3.64141 | H | -3.54164 | -5.39996 | 0.02772  |
| C | -1.17472 | -2.92085 | -2.84904 | H | -3.34341 | -3.00311 | -2.84167 |
| C | 3.92243  | -0.42289 | 2.69327  | H | -2.61949 | -1.44055 | -4.68120 |
| C | 3.78072  | 1.08281  | 2.97287  | H | -2.01046 | -0.28673 | -3.46696 |
| C | 3.04328  | -1.23091 | 3.66212  | H | -3.75936 | -0.64469 | -3.56967 |
| C | 3.79056  | -2.71253 | 0.75666  | H | -0.35913 | -2.21343 | -2.61620 |
| C | 3.68135  | -3.17633 | -0.70829 | H | -1.05477 | -3.25193 | -3.89741 |
| C | 5.06972  | -3.25041 | 1.42387  | H | -1.04203 | -3.80649 | -2.20267 |
| C | 1.73964  | 1.26606  | -3.16680 | H | 4.98176  | -0.71766 | 2.83259  |
| C | 0.24899  | 1.58451  | -3.35473 | H | 4.09220  | 1.30497  | 4.01053  |
| C | 2.09481  | -0.12308 | -3.72647 | H | 2.73020  | 1.40014  | 2.85239  |
| C | 1.71491  | 3.20186  | -0.89571 | H | 4.40007  | 1.70487  | 2.30305  |
|   |          |          |          | H | 3.33450  | -1.01103 | 4.70592  |
|   |          |          |          | H | 1.98236  | -0.94499 | 3.54805  |
|   |          |          |          | H | 3.13483  | -2.32181 | 3.51799  |
|   |          |          |          | H | 2.91143  | -3.10522 | 1.30481  |
|   |          |          |          | H | 3.68818  | -4.28106 | -0.75881 |
|   |          |          |          | H | 2.75102  | -2.81034 | -1.17721 |
|   |          |          |          | H | 4.53633  | -2.81708 | -1.31066 |
|   |          |          |          | H | 5.14619  | -2.98293 | 2.49155  |
|   |          |          |          | H | 5.98447  | -2.89313 | 0.91729  |



|    |          |          |          |   |          |          |          |
|----|----------|----------|----------|---|----------|----------|----------|
| H  | 5.08239  | -4.35437 | 1.35857  | C | -3.95578 | 2.39837  | -0.06038 |
| H  | 2.33753  | 2.02822  | -3.70446 | C | -3.76686 | 2.28962  | -1.58489 |
| H  | -0.04788 | 1.39830  | -4.40370 | C | -5.33537 | 2.97331  | 0.30310  |
| H  | -0.37199 | 0.93781  | -2.70559 | C | -1.86243 | -2.30738 | -2.71090 |
| H  | 0.01020  | 2.63644  | -3.12284 | C | -0.36560 | -2.41994 | -3.03586 |
| H  | 1.58700  | -0.91992 | -3.15483 | C | -2.55245 | -1.24866 | -3.59002 |
| H  | 1.77198  | -0.19640 | -4.78198 | C | -1.36950 | -3.43604 | 0.02478  |
| H  | 3.17967  | -0.32310 | -3.70058 | C | -1.62208 | -3.35779 | 1.54157  |
| H  | 0.61263  | 3.13145  | -0.97372 | C | -1.75949 | -4.81016 | -0.54804 |
| H  | 1.64118  | 4.52903  | 0.83051  | H | 5.87335  | -0.04897 | 0.77335  |
| H  | 1.65598  | 2.78774  | 1.25961  | H | 4.83661  | 1.26862  | 1.35133  |
| H  | 3.15470  | 3.60400  | 0.72404  | H | 1.01821  | 0.15108  | 3.35595  |
| H  | 3.32999  | 4.37149  | -1.82933 | H | -0.51014 | 0.90408  | 3.43619  |
| H  | 1.81880  | 5.26905  | -1.57086 | H | 4.78801  | 0.38732  | -1.60759 |
| H  | 1.93319  | 4.10370  | -2.91044 | H | 5.96819  | 1.53464  | -0.98666 |
| H  | -0.08964 | 1.07173  | 0.39885  | H | 4.19099  | 2.85794  | -1.92155 |
| H  | -0.00718 | -0.60275 | -1.02972 | H | 4.12815  | 3.03723  | -0.16226 |
| H  | 1.00935  | -1.60649 | 0.95320  | H | -4.25237 | -3.07548 | -1.56348 |
| N  | -0.49833 | -1.58645 | 2.55670  | H | -4.16201 | -2.93855 | 0.20082  |
| P  | 3.54056  | -0.81731 | 0.86221  | H | -4.79695 | -0.54146 | -1.64452 |
| P  | 2.27324  | 1.43564  | -1.34186 | H | -6.01782 | -1.58760 | -0.92272 |
| P  | -2.92901 | 1.32428  | 1.02313  | H | -5.07643 | -1.02302 | 1.39470  |
| P  | -2.80547 | -1.68717 | -0.86004 | H | -5.90027 | 0.29776  | 0.55348  |
| Rh | 1.44701  | -0.21202 | 0.09662  | H | 4.82307  | -1.70643 | 2.68081  |
| Rh | -1.28146 | -0.02293 | -0.04097 | H | 3.03159  | -2.60351 | 4.18731  |

4'

SCF Energy = -1514.46326402  
 Enthalpy 0K = -1513.499211  
 Enthalpy 298K = -1513.439646  
 Free Energy 298K = -1513.588930  
 SCF(THF) = -1514.49876963  
 SCF(BP86-D3) = -0.21595541  
 Lowest Frequencies = 20.5868  
 23.7903 cm<sup>-1</sup>

|   |          |          |          |   |          |          |          |
|---|----------|----------|----------|---|----------|----------|----------|
| B | 0.09677  | 0.38535  | 1.43887  | H | 1.76620  | -1.89971 | 3.13756  |
| C | 4.92484  | 0.48253  | 0.58094  | H | 2.80820  | -3.19767 | 2.52713  |
| C | 4.94825  | 1.14167  | -0.81619 | H | 2.96748  | 0.61621  | 3.53033  |
| C | 3.96507  | 2.31781  | -0.98494 | H | 3.92303  | -0.35963 | 4.67759  |
| C | -4.02011 | -2.37670 | -0.74048 | H | 4.74148  | 0.61933  | 3.44481  |
| C | -4.99839 | -1.18586 | -0.77082 | H | 3.48026  | -3.09534 | 0.46792  |
| C | -5.00661 | -0.34960 | 0.52161  | H | 6.14210  | -1.91981 | -0.59774 |
| C | 3.81893  | -1.23981 | 2.68603  | H | 5.93784  | -2.67914 | 1.00570  |
| C | 2.79741  | -2.29146 | 3.15432  | H | 5.71858  | -3.63965 | -0.47098 |
| C | 3.86415  | -0.02071 | 3.62853  | H | 3.61880  | -3.27137 | -1.99365 |
| C | 4.04160  | -2.31124 | -0.07434 | H | 4.04704  | -1.55234 | -2.14534 |
| C | 5.54112  | -2.64566 | -0.02318 | H | 2.42882  | -2.01844 | -1.53834 |
| C | 3.50554  | -2.28017 | -1.51873 | H | 0.27664  | 3.30283  | -0.32163 |
| C | 1.36358  | 3.49580  | -0.24944 | H | 1.20012  | 4.48780  | 1.68082  |
| C | 1.72775  | 3.62223  | 1.24164  | H | 1.44936  | 2.72376  | 1.81532  |
| C | 1.70608  | 4.78615  | -1.01622 | H | 2.80803  | 3.80431  | 1.38435  |
| C | 1.72551  | 2.08644  | -2.86042 | H | 1.36864  | 4.76627  | -2.06486 |
| C | 2.38101  | 0.94056  | -3.65173 | H | 2.79084  | 4.99076  | -1.00990 |
| C | 0.21145  | 2.15753  | -3.11074 | H | 1.21393  | 5.64771  | -0.53050 |
| C | -3.75884 | 1.16684  | 2.65313  | H | 2.19211  | 3.03962  | -3.17453 |
| C | -3.39881 | -0.04344 | 3.53539  | H | 2.17149  | 1.05364  | -4.73027 |
| C | -2.99341 | 2.43454  | 3.07216  | H | 1.98659  | -0.04097 | -3.33547 |
|   |          |          |          | H | 3.47752  | 0.92243  | -3.53145 |
|   |          |          |          | H | -0.30038 | 1.28246  | -2.67101 |
|   |          |          |          | H | 0.00503  | 2.17189  | -4.19590 |
|   |          |          |          | H | -0.24162 | 3.06323  | -2.67466 |
|   |          |          |          | H | -4.84410 | 1.36159  | 2.75506  |
|   |          |          |          | H | -3.58990 | 0.19536  | 4.59663  |
|   |          |          |          | H | -2.33709 | -0.32216 | 3.42657  |
|   |          |          |          | H | -3.99700 | -0.93676 | 3.29053  |
|   |          |          |          | H | -3.05373 | 2.56762  | 4.16681  |
|   |          |          |          | H | -1.92517 | 2.38340  | 2.79515  |

H -3.40670 3.34578 2.61085  
H -3.17103 3.07559 0.32668  
H -3.84069 3.28915 -2.04927  
H -2.77915 1.86348 -1.83341  
H -4.54406 1.65813 -2.04933  
H -5.49094 3.06574 1.39047  
H -6.15564 2.36030 -0.10833  
H -5.44406 3.98314 -0.13098  
H -2.34201 -3.28775 -2.89677  
H -0.23080 -2.62350 -4.11312  
H 0.16099 -1.47943 -2.79910  
H 0.12635 -3.23390 -2.47833  
H -2.16788 -0.23733 -3.37184  
H -2.35991 -1.45963 -4.65695  
H -3.64616 -1.23595 -3.45197  
H -0.29296 -3.24777 -0.14512  
H -1.04564 -4.14644 2.05696  
H -1.31850 -2.37822 1.94567  
H -2.68556 -3.52203 1.79188  
H -2.83924 -5.01050 -0.43684  
H -1.22660 -5.60470 0.00411  
H -1.49923 -4.92253 -1.61314  
H 0.99174 -1.56468 0.72124  
H -0.02591 -0.19200 -0.95911  
H -0.80633 1.38672 0.90628  
N 0.22620 0.52819 2.84178  
P -3.50976 0.75567 0.80820  
P -2.18121 -1.96185 -0.86482  
P 3.51984 -0.73300 0.87308  
P 2.11397 1.90911 -1.00271  
Rh -1.40744 0.05531 0.07224  
Rh 1.41005 -0.18527 0.03064

C

SCF Energy = -1162.26077543  
Enthalpy 0K = -1161.851573  
Enthalpy 298K = -1161.815930  
Free Energy 298K = -1161.917595  
Lowest Frequencies = 24.0963  
27.4491 cm<sup>-1</sup>

C 2.90591 2.75181 0.70632  
C 1.78588 3.51316 0.19683  
C 0.64023 3.25912 1.03082  
C 1.02669 2.26620 1.98815  
C 2.43291 1.97302 1.79291  
Rh 1.17176 1.33757 -0.11904  
B -0.41601 -0.00000 -0.00001  
N -1.82602 -0.00001 -0.00001  
Si -2.77306 1.42953 -0.65987  
C -1.81489 2.46550 -1.92385  
Rh 1.17178 -1.33755 0.11904  
C 1.22961 -1.08202 1.92527  
O 1.27301 -0.96348 3.09791  
C 1.78593 -3.51314 -0.19682  
C 0.64028 -3.25911 -1.03082  
C 1.02675 -2.26619 -1.98815  
C 2.43295 -1.97299 -1.79289

C 2.90596 -2.75178 -0.70630  
C 1.22961 1.08203 -1.92527  
O 1.27303 0.96349 -3.09791  
Si -2.77305 -1.42956 0.65987  
C -1.81486 -2.46552 1.92385  
C -3.31852 -2.54192 -0.78352  
C -4.29545 -0.80513 1.62447  
C -3.31854 2.54189 0.78351  
C -4.29546 0.80509 -1.62447  
H -0.33469 3.73689 0.94578  
H 3.91498 2.74374 0.29497  
H 0.39783 1.84696 2.77287  
H 3.01454 1.25860 2.37440  
H 1.82362 4.21918 -0.63404  
H -5.00821 0.20114 -1.04351  
H -3.98182 0.21800 -2.50427  
H -4.84143 1.68930 -1.99979  
H -0.95332 2.98527 -1.48174  
H -2.51488 3.21563 -2.33591  
H -1.44697 1.85076 -2.76092  
H -4.04059 2.04057 1.44690  
H -3.79355 3.46008 0.39535  
H -2.45057 2.84002 1.39463  
H -0.33463 -3.73690 -0.94580  
H 3.91501 -2.74369 -0.29494  
H 0.39789 -1.84696 -2.77288  
H 3.01458 -1.25856 -2.37438  
H 1.82367 -4.21916 0.63405  
H -5.00821 -0.20119 1.04350  
H -3.98181 -0.21804 2.50427  
H -4.84141 -1.68934 1.99979  
H -0.95330 -2.98529 1.48174  
H -2.51485 -3.21564 2.33591  
H -1.44694 -1.85077 2.76091  
H -4.04057 -2.04061 -1.44691  
H -3.79353 -3.46013 -0.39536  
H -2.45054 -2.84006 -1.39464

D

SCF Energy = -1617.05696766  
Enthalpy 0K = -1615.994059  
Enthalpy 298K = -1615.929254  
Free Energy 298K = -1616.089664  
Lowest Frequencies = 13.3601  
25.5936 cm<sup>-1</sup>

Rh -1.42962 -0.07635 0.08200  
Rh 1.50175 0.08771 0.11666  
P -3.56673 0.28480 0.76307  
P -2.26447 -1.77638 -1.16501  
P 3.62769 0.83230 -0.29351  
P 2.49481 -1.81476 0.82195  
C -4.69061 -1.14358 0.19327  
C -3.82388 0.22788 2.65594  
C -3.15885 -1.02274 3.25493  
C -3.28927 1.49639 3.34259  
C -4.57434 1.84274 0.27021  
C -4.71103 1.91010 -1.26078

|   |          |          |          |               |                |          |          |
|---|----------|----------|----------|---------------|----------------|----------|----------|
| C | -5.94416 | 1.99573  | 0.95481  | H             | 0.18712        | -1.24093 | -2.81921 |
| C | -4.17009 | -1.77280 | -1.10453 | H             | -0.72549       | -3.62053 | -0.97024 |
| C | -1.95580 | -1.59020 | -3.04189 | H             | -2.09216       | -5.64486 | -1.61432 |
| C | -2.33532 | -0.17667 | -3.51548 | H             | -2.12324       | -4.41721 | -2.90148 |
| C | -0.49165 | -1.89629 | -3.39488 | H             | -3.52977       | -4.62637 | -1.82514 |
| C | -1.82653 | -3.61485 | -0.86208 | H             | -1.79260       | -5.00539 | 0.82750  |
| C | -2.42562 | -4.61972 | -1.86108 | H             | -3.25759       | -4.00000 | 0.75871  |
| C | -2.16487 | -3.99158 | 0.59087  | H             | -1.71662       | -3.27738 | 1.30109  |
| C | 4.92504  | -0.38282 | 0.39264  | H             | 5.19970        | 0.01097  | 1.38598  |
| C | 4.13792  | 0.97403  | -2.13115 | H             | 5.83531        | -0.34730 | -0.23253 |
| C | 3.94922  | -0.36702 | -2.85881 | H             | 5.21640        | 1.22393  | -2.12085 |
| C | 3.36158  | 2.09689  | -2.83804 | H             | 4.23282        | -0.26654 | -3.92305 |
| C | 4.28803  | 2.48732  | 0.41481  | H             | 2.89515        | -0.68953 | -2.80504 |
| C | 4.04686  | 2.55943  | 1.93310  | H             | 4.57077        | -1.16911 | -2.42531 |
| C | 5.75301  | 2.81263  | 0.06880  | H             | 3.65340        | 2.15145  | -3.90304 |
| C | 4.37497  | -1.80860 | 0.51768  | H             | 3.55169        | 3.08760  | -2.39220 |
| C | 2.37724  | -2.08819 | 2.71282  | H             | 2.27523        | 1.90728  | -2.79212 |
| C | 0.93619  | -2.43963 | 3.11990  | H             | 3.63197        | 3.23757  | -0.06034 |
| C | 2.87656  | -0.84866 | 3.47276  | H             | 4.26867        | 3.57674  | 2.30415  |
| C | 2.02189  | -3.55129 | 0.16740  | H             | 4.70421        | 1.86372  | 2.48578  |
| C | 2.20768  | -3.62052 | -1.35729 | H             | 3.00253        | 2.31569  | 2.18635  |
| C | 2.72698  | -4.73021 | 0.86338  | H             | 6.04131        | 3.77666  | 0.52703  |
| C | -0.20449 | 3.49222  | 0.25137  | H             | 5.92568        | 2.90471  | -1.01599 |
| C | -0.84495 | 3.99413  | 1.57270  | H             | 6.44732        | 2.04839  | 0.46082  |
| C | 1.11820  | 4.27050  | 0.06361  | H             | 4.52724        | -2.36212 | -0.42463 |
| C | -1.18977 | 3.76730  | -0.94710 | H             | 4.88669        | -2.37566 | 1.31610  |
| C | -0.57732 | 3.47085  | -2.33144 | H             | 3.04595        | -2.94084 | 2.94105  |
| C | -1.79493 | 5.19032  | -0.97047 | H             | 0.85484        | -2.51511 | 4.21987  |
| B | 0.09902  | 1.87998  | 0.43525  | H             | 0.60311        | -3.40160 | 2.69498  |
| H | -1.09945 | 1.42765  | 0.82033  | H             | 0.23764        | -1.65773 | 2.77232  |
| H | 0.58030  | 1.40585  | -0.69947 | H             | 2.79643        | -1.01059 | 4.56376  |
| H | 0.85606  | 1.63115  | 1.39517  | H             | 2.27286        | 0.03511  | 3.20490  |
| H | 0.10861  | -0.92870 | -0.12341 | H             | 3.93196        | -0.61779 | 3.24841  |
| H | -5.72938 | -0.78401 | 0.08271  | H             | 0.93876        | -3.59991 | 0.38553  |
| H | -4.69139 | -1.88382 | 1.01221  | H             | 1.71477        | -4.52136 | -1.76741 |
| H | -4.91986 | 0.16468  | 2.80382  | H             | 3.27571        | -3.68845 | -1.63232 |
| H | -3.33988 | -1.06363 | 4.34508  | H             | 1.78824        | -2.73043 | -1.85166 |
| H | -2.06962 | -0.99491 | 3.07923  | H             | 2.39247        | -5.68646 | 0.42005  |
| H | -3.54293 | -1.95918 | 2.81724  | H             | 2.51576        | -4.77904 | 1.94396  |
| H | -3.44779 | 1.43087  | 4.43473  | H             | 3.82283        | -4.68119 | 0.73268  |
| H | -3.78610 | 2.41634  | 2.99177  | H             | -1.86068       | 3.58172  | 1.71449  |
| H | -2.20628 | 1.60808  | 3.16494  | H             | -0.92675       | 5.09693  | 1.60977  |
| H | -3.91558 | 2.67352  | 0.58807  | H             | -0.23902       | 3.67899  | 2.44117  |
| H | -5.15704 | 2.87440  | -1.56489 | H             | 1.68362        | 3.92034  | -0.81700 |
| H | -5.37406 | 1.11091  | -1.64043 | H             | 1.76421        | 4.14703  | 0.94997  |
| H | -3.73184 | 1.81099  | -1.75673 | H             | 0.94388        | 5.35730  | -0.06269 |
| H | -6.44280 | 2.91506  | 0.59610  | H             | -2.02966       | 3.05575  | -0.80861 |
| H | -5.87121 | 2.06894  | 2.05204  | H             | -1.35159       | 3.52762  | -3.11802 |
| H | -6.61691 | 1.15231  | 0.71598  | H             | -0.12675       | 2.46538  | -2.37333 |
| H | -4.55666 | -2.79821 | -1.24185 | H             | 0.20423        | 4.20660  | -2.59443 |
| H | -4.49956 | -1.18369 | -1.97714 | H             | -2.46020       | 5.31041  | -1.84467 |
| H | -2.61929 | -2.32796 | -3.53554 | H             | -1.01197       | 5.96638  | -1.05309 |
| H | -2.12499 | -0.07147 | -4.59590 | H             | -2.39053       | 5.41415  | -0.07004 |
| H | -1.74985 | 0.58084  | -2.96613 |               |                |          |          |
| H | -3.40372 | 0.05028  | -3.36415 | E             |                |          |          |
| H | -0.31541 | -1.71739 | -4.47142 | SCF Energy =  | -3059.31054031 |          |          |
| H | -0.21705 | -2.94294 | -3.18512 | Enthalpy 0K = | -3058.211173   |          |          |

Enthalpy 298K = -3058.132115  
Free Energy 298K = -3058.334584  
Lowest Frequencies = 11.5815  
13.2761 cm-1

C -5.61380 2.06789 0.29498  
C -4.97056 1.02150 -0.39527  
C -5.67930 -0.17449 -0.64735  
C -7.00820 -0.31627 -0.22404  
C -7.64580 0.73253 0.45965  
C -6.94483 1.91946 0.72026  
P -3.24132 1.18237 -1.08500  
C -3.56853 0.80993 -2.88533  
C -2.65376 0.07679 -3.66735  
C -2.92550 -0.17099 -5.02367  
C -4.10363 0.31253 -5.61208  
C -5.01748 1.04897 -4.83898  
C -4.75596 1.29395 -3.48309  
Rh -1.38969 0.00475 -0.20153  
P -2.40891 -1.23580 1.45225  
C -1.20674 -1.92279 2.71566  
C -1.24975 -1.57267 4.07933  
C -0.35190 -2.15905 4.98963  
C 0.59110 -3.09961 4.55016  
C 0.63579 -3.45698 3.19064  
C -0.25495 -2.87017 2.28136  
Rh 1.39458 0.05599 0.16029  
P 3.25932 1.33976 0.88439  
C 4.95519 0.56325 0.99551  
C 5.77847 0.45759 -0.14765  
C 7.04625 -0.13824 -0.05511  
C 7.50620 -0.64321 1.17116  
C 6.69389 -0.54176 2.31138  
C 5.42844 0.06008 2.22783  
Cl -0.11996 1.49040 1.46306  
Cl 0.09455 1.15099 -1.80717  
P 2.39134 -1.46013 -1.26818  
C 1.18279 -2.25333 -2.45499  
C 1.18304 -1.94422 -3.82924  
C 0.28678 -2.58896 -4.69981  
C -0.61577 -3.54424 -4.20816  
C -0.62490 -3.85213 -2.83621  
C 0.26494 -3.20724 -1.96557  
C 3.20947 -2.94941 -0.50307  
C 3.73690 -2.87730 0.80135  
C 4.39228 -3.98410 1.36468  
C 4.52371 -5.17520 0.63328  
C 3.99948 -5.25615 -0.66724  
C 3.34582 -4.15143 -1.23530  
C 3.66719 -0.75094 -2.42779  
C 4.79565 -1.49352 -2.83290  
C 5.71364 -0.94003 -3.73992  
C 5.51513 0.35415 -4.24905  
C 4.39086 1.09637 -3.85010  
C 3.46963 0.54986 -2.94126  
C 3.53135 2.93270 -0.04074  
C 4.80244 3.54165 -0.13718  
C 4.94160 4.78150 -0.78182

C 3.81934 5.42433 -1.32926  
C 2.55287 4.82560 -1.22724  
C 2.40481 3.58522 -0.58665  
C 2.99502 1.90015 2.64964  
C 3.45481 3.16321 3.07536  
C 3.32354 3.54709 4.41981  
C 2.74106 2.67433 5.35188  
C 2.27943 1.41597 4.93254  
C 2.39716 1.03176 3.58788  
C -3.28236 -2.79927 0.92732  
C -3.56578 -3.06760 -0.42591  
C -4.22729 -4.25189 -0.79366  
C -4.60820 -5.18060 0.18710  
C -4.31884 -4.92646 1.53856  
C -3.65632 -3.74656 1.90842  
C -3.63370 -0.31391 2.51235  
C -3.21756 0.89840 3.10982  
C -4.07858 1.59215 3.97413  
C -5.36480 1.09391 4.24008  
C -5.78799 -0.09810 3.63297  
C -4.92882 -0.80325 2.77406  
C -2.89404 3.01085 -1.03629  
C -2.86195 3.79399 -2.20782  
C -2.58767 5.16939 -2.12753  
C -2.34489 5.77290 -0.88392  
C -2.36487 4.99388 0.28538  
C -2.62746 3.61796 0.21070  
H 3.63690 -1.95368 1.37717  
H 4.80108 -3.91123 2.37750  
H 5.03128 -6.03883 1.07483  
H 4.09532 -6.18211 -1.24330  
H 2.93423 -4.22947 -2.24605  
H 4.96751 -2.49775 -2.43545  
H 6.58771 -1.52373 -4.04666  
H 6.23434 0.78280 -4.95440  
H 4.22820 2.10573 -4.24108  
H 2.59808 1.13269 -2.62869  
H 1.88771 -1.20985 -4.22786  
H 0.30914 -2.34944 -5.76808  
H -1.30387 -4.05390 -4.89028  
H -1.32249 -4.59701 -2.44043  
H 0.25574 -3.46323 -0.90171  
H 5.68291 3.05433 0.29109  
H 5.93103 5.24506 -0.85184  
H 3.93222 6.39084 -1.83118  
H 1.67158 5.32109 -1.64684  
H 1.41508 3.12488 -0.51440  
H 3.91338 3.85222 2.36045  
H 3.68088 4.53249 4.73604  
H 2.64330 2.97510 6.40006  
H 1.81491 0.73093 5.64902  
H 2.00282 0.06324 3.26471  
H 5.44215 0.85596 -1.10822  
H 7.67419 -0.20307 -0.94917  
H 8.49660 -1.10449 1.23971  
H 7.04896 -0.91785 3.27642  
H 4.81770 0.15491 3.13024

|   |          |          |          |   |          |          |          |
|---|----------|----------|----------|---|----------|----------|----------|
| H | -3.24831 | -2.35668 | -1.19567 | H | -2.13698 | 6.84617  | -0.82476 |
| H | -4.44104 | -4.44679 | -1.84974 | H | -2.16491 | 5.45445  | 1.25829  |
| H | -5.12167 | -6.10390 | -0.09960 | H | -2.61458 | 3.01430  | 1.12286  |
| H | -4.60322 | -5.65110 | 2.30818  | H | -1.72592 | -0.29339 | -3.22297 |
| H | -3.42143 | -3.56613 | 2.96231  | H | -2.20805 | -0.74777 | -5.61566 |
| H | -2.21331 | 1.28622  | 2.90920  | H | -4.31303 | 0.11564  | -6.66854 |
| H | -3.73930 | 2.52199  | 4.44271  | H | -5.94002 | 1.42943  | -5.28911 |
| H | -6.03524 | 1.63485  | 4.91559  | H | -5.47987 | 1.85883  | -2.88775 |
| H | -6.79239 | -0.48762 | 3.82667  | H | -5.20219 | -0.99004 | -1.19858 |
| H | -5.27352 | -1.73051 | 2.30961  | H | -7.54826 | -1.24419 | -0.43874 |
| H | -1.98628 | -0.85121 | 4.44170  | H | -8.68708 | 0.62683  | 0.78065  |
| H | -0.40385 | -1.88353 | 6.04812  | H | -7.43604 | 2.74476  | 1.24561  |
| H | 1.28252  | -3.56069 | 5.26292  | H | -5.08980 | 3.00898  | 0.48195  |
| H | 1.36605  | -4.19050 | 2.83483  | H | 1.77216  | -0.83805 | 1.35483  |
| H | -0.21263 | -3.15666 | 1.22631  | H | -1.75979 | -1.08948 | -1.21686 |
| H | -3.04827 | 3.33530  | -3.18245 | H | 0.00902  | -1.03276 | 0.06648  |
| H | -2.56737 | 5.76846  | -3.04383 |   |          |          |          |

## 27. References

- (1) Pangborn, A. B.; Giardello, M. A.; Grubbs, R. H.; Rosen, R. K.; Timmers, F. J. *Organometallics* **1996**, *15*, 1518.
- (2) Pernik, I.; Hooper, J. F.; Chaplin, A. B.; Weller, A. S.; Willis, M. C. *Acs Catalysis* **2012**, *2*, 2779.
- (3) Fryzuk, M. D.; Piers, W. E.; Einstein, F. W. B.; Jones, T. *Canadian Journal of Chemistry- Revue Canadienne De Chimie* **1989**, *67*, 883.
- (4) Stephens, F. H.; Baker, R. T.; Matus, M. H.; Grant, D. J.; Dixon, D. A. *Angew. Chem. Int. Ed.* **2007**, *46*, 746.
- (5) Dallanegra, R.; Robertson, A. P. M.; Chaplin, A. B.; Manners, I.; Weller, A. S. *Chem. Commun.* **2011**, *47*, 3763.
- (6) Jaska, C. A.; Temple, K.; Lough, A. J.; Manners, I. *J. Am. Chem. Soc.* **2003**, *125*, 9424.
- (7) Lubben, A. T.; McIndoe, J. S.; Weller, A. S. *Organometallics* **2008**, *27*, 3303.
- (8) Kumar, A.; Ishibashi, J. S. A.; Hooper, T. N.; Mikulas, T. C.; Dixon, D. A.; Liu, S.-Y.; Weller, A. S. *Chem. Eur. J.* **2016**, *22*, 310.
- (9) Kalviri, H. A.; Gaertner, F.; Ye, G.; Korobkov, I.; Baker, R. T. *Chem. Sci.* **2015**, *6*, 618.
- (10) Staubitz, A.; Sloan, M. E.; Robertson, A. P. M.; Friedrich, A.; Schneider, S.; Gates, P. J.; Guenne, J. S. A. D.; Manners, I. *J. Am. Chem. Soc.* **2010**, *132*, 13332.
- (11) Ewing, W. C.; Carroll, P. J.; Sneddon, L. G. *Inorg. Chem.* **2013**, *52*, 10690.
- (12) Metters, O. J.; Chapman, A. M.; Robertson, A. P. M.; Woodall, C. H.; Gates, P. J.; Wass, D. F.; Manners, I. *Chem. Commun.* **2014**, *50*, 12146.
- (13) Dodds, A. R.; Kodama, G. *Inorg. Chem.* **1977**, *16*, 2900.
- (14) Rosello-Merino, M.; Lopez-Serrano, J.; Conejero, S. *J. Am. Chem. Soc.* **2013**, *135*, 10910.
- (15) Johnson, H. C.; Robertson, A. P. M.; Chaplin, A. B.; Sewell, L. J.; Thompson, A. L.; Haddow, M. F.; Manners, I.; Weller, A. S. *J. Am. Chem. Soc.* **2011**, *133*, 11076.
- (16) Espenson, J. H. *Chemical Kinetics and Reaction Mechanisms*; McGraw-Hill, Inc., 1995.
- (17) Cosier, J.; Glazer, A. M. *J. App. Cryst.* **1986**, *19*, 105.
- (18) Otwinowski, Z.; Minor, W. In *Macromolecular Crystallography, Pt A* 1997; Vol. 276, p 307.
- (19) *Oxford Diffraction Ltd, Abingdon, England: 2011.*
- (20) Palatinus, L.; Chapuis, G. *Journal of Applied Crystallography* **2007**, *40*, 786.

- (21) Betteridge, P. W.; Carruthers, J. R.; Cooper, R. I.; Prout, K.; Watkin, D. J. *Journal of Applied Crystallography* **2003**, 36, 1487.
- (22) Spek, A. L. *Journal of Applied Crystallography* **2003**, 36, 7.
